# Supplementary material for: Sensitivity to Communication Partners During Naturalistic AAC Conversations in Cantonese Chinese
Source: Front Psychol. 2021 Aug 18;12:686657. doi: 10.3389/fpsyg.2021.686657 (PMC8416610; doi:10.3389/fpsyg.2021.686657)
Supplement: Supplementary file 1 [file Table_1.xlsx]

## Sheet: symbol
Rank	Symbol	Translation	Token	% of Occurrence	Cumulative %	Category	Part of Speech	Commonality in UtoU	Commonality in UtoST	Commonality in STtoU
1	你好	hello	189	0.0909091	0.0909091	Social expression	intj	0.6	0.69231	0.9
2	我	I	172	0.0827321	0.173641	Character	pron	0.56	0.46154	0.7
3	你	you	149	0.0716691	0.24531	Character	pron	0.56	0.23077	0.8
4	食	food	139	0.0668591	0.312169	Activities	v	0.48	0.38462	0.9
5	拜拜	goodbye	131	0.0630111	0.37518	Social expression	intj	0.6	0.65385	1
6	鍾意	like	92	0.044252	0.419432	Activities	v	0.32	0.26923	0.7
7	甚麼	what	81	0.038961	0.458393	Function word	pron	0.36	0.03846	0.9
8	OK	OK	58	0.027898	0.486291	Social expression	intj	0.24	0.53846	0.8
9	開心	happy	56	0.026936	0.513228	Emotional Expression	adj	0.44	0.23077	0.6
10	嗎	question marker	55	0.026455	0.539683	Function word	ptcl	0.2	0.11538	0.6
11	飲	drink	50	0.02405	0.563733	Activities	v	0.4	0.26923	0.6
12	打招呼	greet	30	0.01443	0.578163	Social expression	v	0.32	0.11538	0.4
13	去	go	28	0.013468	0.591631	Activities	v	0.2	0.07692	0.8
14	有	have	28	0.013468	0.605099	Object property	v	0.08	0.19231	0.4
15	麵包	bread	20	0.00962001	0.614719	Food	n	0.24	0.11538	0.2
16	多謝	thank you	20	0.00962001	0.624339	Social expression	intj	0.16	0.23077	0.4
17	哪裡	where	17	0.00817701	0.632516	Function word	adv	0.12	#N/A	0.7
18	做甚麼	doing what	16	0.00769601	0.640212	Function word	phrase	0.16	0.03846	0.2
19	燒賣	siumai (type of food)	16	0.00769601	0.647908	Food	n	0.28	0.11538	#N/A
20	水	water	15	0.00721501	0.655123	Food	n	0.24	0.11538	0.3
21	媽媽	mother	14	0.00673401	0.661857	Character	n	0.2	0.19231	0.1
22	一起玩耍	play together	13	0.00625301	0.66811	Social expression	phrase	0.16	0.19231	0.2
23	無	no	13	0.00625301	0.674363	Object property	adj	#N/A	0.11538	0.4
24	蛋糕	cake	12	0.00577201	0.680135	Food	n	0.16	0.03846	0.1
25	好食	delicious	12	0.00577201	0.685907	Emotional Expression	adj	0.08	0.11538	0.4
26	雞脾	chicken thigh	11	0.00529101	0.691198	Food	n	0.08	#N/A	0.1
27	牛奶	milk	11	0.00529101	0.696489	Food	n	0.24	0.07692	#N/A
28	哥哥	older brother	10	0.00481	0.701299	Character	n	0.12	0.19231	#N/A
29	上午	morning	10	0.00481	0.706109	Function word	n	0.04	0.07692	0.4
30	茶	tea	10	0.00481	0.710919	Food	n	0.2	0.03846	0.1
31	爸爸	father	9	0.004329	0.715248	Character	n	0.12	0.07692	#N/A
32	飯	rice	9	0.004329	0.719577	Food	n	0.08	0.07692	0.2
33	買	buy	8	0.003848	0.723425	Activities	v	0.2	#N/A	#N/A
34	酒樓	Chinese restaurant	8	0.003848	0.727273	Places	n	0.16	0.15385	#N/A
35	麵	noodle	8	0.003848	0.731121	Food	n	0.12	0.15385	#N/A
36	腸粉	rice roll	8	0.003848	0.734969	Food	n	0.08	0.11538	0.1
37	玩電腦	play on the computer	8	0.003848	0.738817	Activities	phrase	0.04	0.11538	0.3
38	聽歌	listen to songs	8	0.003848	0.742665	Activities	phrase	0.04	0.07692	0.2
39	上課	attend class	8	0.003848	0.746513	Activities	v	#N/A	0.15385	0.1
40	剛才	just now	8	0.003848	0.750361	Function word	adj	#N/A	#N/A	0.4
41	益力多	Yakult (drink)	7	0.003367	0.753728	Food	n	0.16	0.03846	0.1
42	靚	pretty	7	0.003367	0.757095	Object property	adj	0.12	0.03846	0.1
43	食飯	eat a meal	7	0.003367	0.760462	Activities	phrase	0.12	0.03846	0.3
44	做得好	well done	7	0.003367	0.763829	Emotional Expression	phrase	#N/A	#N/A	0.3
45	幫忙	help	7	0.003367	0.767196	Social expression	v	0.08	0.11538	#N/A
46	我地	we	6	0.002886	0.770082	Character	pron	0.08	0.03846	0.2
47	牛肉	beef	6	0.002886	0.772968	Food	n	0.08	0.07692	0.1
48	粽	glutinous rice dumpling (festive food)	6	0.002886	0.775854	Food	n	0.04	0.07692	0.1
49	菜	vegetable	6	0.002886	0.77874	Food	n	#N/A	0.11538	0.1
50	巴士	bus	6	0.002886	0.781626	Transportation	n	#N/A	0.15385	0.2
51	上班	go to work	6	0.002886	0.784512	Activities	v	#N/A	0.07692	0.1
52	昨天	yesterday	6	0.002886	0.787398	Function word	n	#N/A	0.03846	0.2
53	何時	when	6	0.002886	0.790284	Function word	adv	#N/A	#N/A	0.3
54	坐	sit	6	0.002886	0.79317	Activities	v	0.04	0.07692	0.2
55	雪糕	ice cream	5	0.002405	0.795575	Food	n	0.08	0.11538	#N/A
56	唔鍾意	do not like	5	0.002405	0.79798	Activities	phrase	#N/A	0.11538	#N/A
57	唔知道	do not know	5	0.002405	0.800385	Activities	phrase	#N/A	0.11538	0.1
58	端午節	Dragon Boat Festival	5	0.002405	0.80279	Festival	n	#N/A	0.07692	0.2
59	一陣	for a while	5	0.002405	0.805195	Function word	adv	#N/A	0.07692	0.2
60	洗／抹面	wash/wipe face	5	0.002405	0.8076	Activities	v	#N/A	#N/A	0.3
61	BB	baby	4	0.001924	0.809524	Character	n	#N/A	0.07692	#N/A
62	姐姐	older sister	4	0.001924	0.811448	Character	n	0.08	0.03846	#N/A
63	知道	know	4	0.001924	0.813372	Activities	v	0.08	#N/A	0.1
64	塗	paint	4	0.001924	0.815296	Activities	v	0.04	0.03846	#N/A
65	蘋果汁	apple juice	4	0.001924	0.81722	Food	n	0.12	0.03846	#N/A
66	餐廳	restaurant	4	0.001924	0.819144	Places	n	0.08	0.07692	#N/A
67	行	walk	4	0.001924	0.821068	Activities	v	0.08	0.07692	#N/A
68	餅乾	biscuit	4	0.001924	0.822992	Food	n	0.08	0.07692	#N/A
69	肉	meat	4	0.001924	0.824916	Food	n	0.04	0.07692	#N/A
70	廁所	toilet	4	0.001924	0.82684	Furniture	n	0.04	0.07692	#N/A
71	誰	who	4	0.001924	0.828764	Function word	pron	0.04	0.07692	0.1
72	蛋撻	egg tart	4	0.001924	0.830688	Food	n	#N/A	0.11538	0.1
73	發燒	fever	4	0.001924	0.832612	Emotional Expression	adj	#N/A	0.03846	0.1
74	老師	teacher	4	0.001924	0.834536	Character	n	#N/A	0.03846	0.1
75	畫畫	draw	4	0.001924	0.83646	Activities	v	#N/A	0.03846	0.1
76	同學	classmate	4	0.001924	0.838384	Character	n	0.08	#N/A	0.1
77	約期	make an appointment	3	0.001443	0.839827	Activities	v	0.08	#N/A	#N/A
78	學校	school	3	0.001443	0.84127	Places	n	0.08	#N/A	#N/A
79	悶	bored	3	0.001443	0.842713	Emotional Expression	adj	0.08	#N/A	0.1
80	不明白	do not understand	3	0.001443	0.844156	Emotional Expression	phrase	0.08	#N/A	0.1
81	芝士	cheese	3	0.001443	0.845599	Food	n	0.08	#N/A	0.1
82	可樂	coca cola	3	0.001443	0.847042	Food	n	0.08	0.03846	#N/A
83	我要	I want	3	0.001443	0.848485	Activities	phrase	0.04	#N/A	0.1
84	商場	mall	3	0.001443	0.849928	Places	n	0.08	0.03846	#N/A
85	談話	conversation	3	0.001443	0.851371	Activities	v	0.08	#N/A	0.1
86	弟弟	little brother	3	0.001443	0.852814	Character	n	0.04	0.03846	#N/A
87	蝦條	shrimp crackers	3	0.001443	0.854257	Food	n	0.08	#N/A	0.1
88	或者	or	3	0.001443	0.8557	Function word	conj	0.08	#N/A	0.1
89	粥	p	3	0.001443	0.857143	Food	n	0.04	0.03846	#N/A
90	薯條	French fries	3	0.001443	0.858586	Food	n	0.04	0.03846	0.1
91	看醫生	see a doctor	3	0.001443	0.860029	Activities	v	0.04	#N/A	0.1
92	是	yes	3	0.001443	0.861472	Activities	v	0.04	#N/A	0.1
93	意大利粉	spaghetti	3	0.001443	0.862915	Food	n	0.04	0.03846	0.1
94	麥精	malt	3	0.001443	0.864358	Food	n	0.04	#N/A	0.2
95	夜晚	night	3	0.001443	0.865801	Function word	n	0.04	#N/A	0.1
96	洗手間	restroom	3	0.001443	0.867244	Places	n	0.04	#N/A	0.1
97	糖	sugar	3	0.001443	0.868687	Food	n	#N/A	0.03846	#N/A
98	校車	school bus	3	0.001443	0.87013	Activities	n	#N/A	0.11538	#N/A
99	橙	orange	3	0.001443	0.871573	Food	n	#N/A	0.03846	0.1
100	看書	read a book	3	0.001443	0.873016	Activities	phrase	#N/A	0.03846	0.1
101	雞蛋	egg	3	0.001443	0.874459	Food	n	#N/A	0.07692	0.1
102	百力滋	Pretz (snack)	3	0.001443	0.875902	Food	n	#N/A	0.03846	0.2
103	生日會	Birthday party	3	0.001443	0.877345	Festival	n	#N/A	0.03846	0.1
104	妹妹	younger sister	3	0.001443	0.878788	Character	n	#N/A	#N/A	0.2
105	留心聽	listen carefully	3	0.001443	0.880231	Social expression	phrase	#N/A	#N/A	0.2
106	朱古力	chocolate	3	0.001443	0.881674	Food	n	0.12	#N/A	#N/A
107	馬	horse	3	0.001443	0.883117	Animal&Plants	n	0.12	#N/A	#N/A
108	橙汁	orange juice	2	0.000962001	0.884079	Food	n	0.04	0.03846	#N/A
109	牛	cow	2	0.000962001	0.885041	Animal&Plants	n	0.04	#N/A	#N/A
110	肥	fat	2	0.000962001	0.886003	Object property	adj	0.08	#N/A	#N/A
111	機械人	robot	2	0.000962001	0.886965	Toys	n	0.08	#N/A	#N/A
112	香腸	sausage	2	0.000962001	0.887927	Food	n	0.08	#N/A	#N/A
113	狗	dog	2	0.000962001	0.888889	Animal&Plants	n	0.08	#N/A	#N/A
114	遊戲機	game console	2	0.000962001	0.889851	Toys	n	0.08	#N/A	#N/A
115	上街	go to the street	2	0.000962001	0.890813	Activities	v	0.08	#N/A	#N/A
116	雞翼	chicken wings	2	0.000962001	0.891775	Food	n	0.08	#N/A	#N/A
117	嫲嫲／婆婆	grandmother	2	0.000962001	0.892737	Character	n	0.08	#N/A	#N/A
118	蛋卷	egg roll	2	0.000962001	0.893699	Food	n	0.08	#N/A	#N/A
119	花生醬	peanut butter	2	0.000962001	0.894661	Food	n	0.04	#N/A	#N/A
120	錢	money	2	0.000962001	0.895623	Daily necessities	n	0.04	0.03846	#N/A
121	復活節	Easter	2	0.000962001	0.896585	Festival	n	0.04	0.03846	#N/A
122	問句	question	2	0.000962001	0.897547	Activities	ptcl	0.04	#N/A	0.1
123	新年	new year	2	0.000962001	0.898509	Festival	n	0.04	0.03846	#N/A
124	廳	sitting room	2	0.000962001	0.899471	Places	n	0.04	0.03846	#N/A
125	士多啤梨	strawberry	2	0.000962001	0.900433	Food	n	0.04	0.03846	#N/A
126	啫喱	jelly	2	0.000962001	0.901395	Food	n	0.04	0.03846	#N/A
127	聖誕咭	Christmas card	2	0.000962001	0.902357	Festival	n	#N/A	0.03846	#N/A
128	電腦	computer	2	0.000962001	0.903319	Electrical appliances	n	#N/A	0.03846	#N/A
129	聖誕老人	Santa Claus	2	0.000962001	0.904281	Festival	n	#N/A	0.07692	#N/A
130	職業治療師	occupational therapist	2	0.000962001	0.905243	Character	n	#N/A	0.07692	#N/A
131	雪條	ice popsicle	2	0.000962001	0.906205	Food	n	#N/A	0.07692	#N/A
132	醫院	hospital	2	0.000962001	0.907167	Places	n	#N/A	0.07692	#N/A
133	1	1	2	0.000962001	0.908129	Function word	adj	#N/A	0.07692	#N/A
134	抽筋	cramp	2	0.000962001	0.909091	Emotional Expression	adj	#N/A	0.07692	#N/A
135	藥房	pharmacy	2	0.000962001	0.910053	Places	n	#N/A	0.07692	#N/A
136	污糟	dirty	2	0.000962001	0.911015	Object property	adj	#N/A	0.07692	#N/A
137	美食廣場	food court	2	0.000962001	0.911977	Places	n	#N/A	0.07692	#N/A
138	電飯煲	rice cooker	2	0.000962001	0.912939	Electrical appliances	n	#N/A	0.03846	#N/A
139	叉燒	barbecued pork	2	0.000962001	0.913901	Food	n	#N/A	0.07692	#N/A
140	三文治	sandwich	2	0.000962001	0.914863	Food	n	#N/A	0.07692	#N/A
141	兒童節	children's day	2	0.000962001	0.915825	Festival	n	#N/A	0.03846	#N/A
142	波	ball	2	0.000962001	0.916787	Toys	n	#N/A	0.07692	#N/A
143	車	car	2	0.000962001	0.917749	Toys	n	#N/A	0.07692	#N/A
144	旅行	travel	2	0.000962001	0.918711	Activities	n	#N/A	0.03846	0.1
145	魚	fish	2	0.000962001	0.919673	Food	n	#N/A	0.03846	0.1
146	熱	hot	2	0.000962001	0.920635	Emotional Expression	adj	#N/A	0.03846	0.1
147	洗澡	take a shower	2	0.000962001	0.921597	Activities	v	#N/A	0.03846	0.1
148	紫菜	seaweed	2	0.000962001	0.922559	Food	n	#N/A	0.03846	0.1
149	晚禮服	evening gown	2	0.000962001	0.923521	Clothing	n	#N/A	0.03846	0.1
150	飛機	airplane	2	0.000962001	0.924483	Toys	n	#N/A	0.03846	0.1
151	痛	painful	2	0.000962001	0.925445	Emotional Expression	adj	#N/A	0.03846	0.1
152	薯仔	potato	2	0.000962001	0.926407	Food	n	#N/A	0.03846	0.1
153	維他奶	Vitasoy	2	0.000962001	0.927369	Food	n	#N/A	0.03846	0.1
154	要	want	2	0.000962001	0.928331	#N/A	v	#N/A	#N/A	0.1
155	多	many	2	0.000962001	0.929293	Object property	adj	#N/A	#N/A	0.1
156	上學	go to school	2	0.000962001	0.930255	Activities	v	#N/A	#N/A	0.1
157	怎樣	how	2	0.000962001	0.931217	Function word	adv	#N/A	#N/A	0.2
158	叉燒包	barbecued pork bun	2	0.000962001	0.932179	Food	n	#N/A	#N/A	0.1
159	少	less	2	0.000962001	0.933141	Object property	adj	#N/A	#N/A	0.1
160	害怕	scared	2	0.000962001	0.934103	Emotional Expression	adj	0.08	#N/A	#N/A
161	汽水	soda	2	0.000962001	0.935065	Food	n	0.04	0.03846	#N/A
162	碟	dish	2	0.000962001	0.936027	Daily necessities	n	0.04	0.03846	#N/A
163	羊	sheep	2	0.000962001	0.936989	Animal&Plants	n	0.04	0.03846	#N/A
164	波鞋	sneakers	2	0.000962001	0.937951	Clothing	n	0.04	0.03846	#N/A
165	嘔	vomit	2	0.000962001	0.938913	Emotional Expression	v	0.04	0.03846	#N/A
166	生病	sick	2	0.000962001	0.939875	Emotional Expression	adj	0.08	#N/A	#N/A
167	碗	bowl	2	0.000962001	0.940837	Daily necessities	n	0.08	#N/A	#N/A
168	超級市場	supermarket	1	0.000481	0.941318	Places	n	0.04	#N/A	#N/A
169	飲茶	yum cha (Chinese style breakfast)	1	0.000481	0.941799	Activities	v	0	#N/A	#N/A
170	慢慢行	walk slowly	1	0.000481	0.94228	Social expression	phrase	0.04	#N/A	#N/A
171	魚蛋	fishball	1	0.000481	0.942761	Food	n	0.04	#N/A	#N/A
172	零食鋪	snackshop	1	0.000481	0.943242	Places	n	0.04	#N/A	#N/A
173	文化中心	cultural center	1	0.000481	0.943723	Places	n	0.04	#N/A	#N/A
174	襪	sock	1	0.000481	0.944204	Clothing	n	0.04	#N/A	#N/A
175	煙花	fireworks	1	0.000481	0.944685	Festival	n	0.04	#N/A	#N/A
176	地鐵	subway	1	0.000481	0.945166	Transportation	n	0.04	#N/A	#N/A
177	佢	third persons singular pronoun	1	0.000481	0.945647	Character	pron	0.04	#N/A	#N/A
178	記得	remember	1	0.000481	0.946128	Activities	v	0.04	#N/A	#N/A
179	快餐店	fast food shop	1	0.000481	0.946609	Places	n	0.04	#N/A	#N/A
180	入面	inside	1	0.000481	0.94709	Function word	adj	0.04	#N/A	#N/A
181	母親節	Mother's Day	1	0.000481	0.947571	Festival	n	0.04	#N/A	#N/A
182	爺爺／公公	grandfather	1	0.000481	0.948052	Character	n	0.04	#N/A	#N/A
183	藍色	blue	1	0.000481	0.948533	Object property	adj	0.04	#N/A	#N/A
184	芒果	mango	1	0.000481	0.949014	Food	n	0.04	#N/A	#N/A
185	看電視	watch TV	1	0.000481	0.949495	Activities	v	0.04	#N/A	#N/A
186	樹	tree	1	0.000481	0.949976	Animal&Plants	n	0.04	#N/A	#N/A
187	右	right (direction)	1	0.000481	0.950457	Function word	adj	0.04	#N/A	#N/A
188	薄餅	pizza	1	0.000481	0.950938	Food	n	0.04	#N/A	#N/A
189	玩玩具	play with toys	1	0.000481	0.951419	Activities	v	0.04	#N/A	#N/A
190	手提電話	mobile phone	1	0.000481	0.9519	Electrical appliances	n	0.04	#N/A	#N/A
191	菊花茶	chrysanthemum tea	1	0.000481	0.952381	Food	n	0.04	#N/A	#N/A
192	拍拖	dating	1	0.000481	0.952862	Activities	v	0.04	#N/A	#N/A
193	紙包果汁	juice box	1	0.000481	0.953343	Food	n	0.04	#N/A	#N/A
194	服裝店	clothing store	1	0.000481	0.953824	Places	n	0.04	#N/A	#N/A
195	睡房	bedroom	1	0.000481	0.954305	Places	n	0.04	#N/A	#N/A
196	香蕉	banana	1	0.000481	0.954786	Food	n	0.04	#N/A	#N/A
197	收拾玩具	clean up toys	1	0.000481	0.955267	Activities	phrase	0.04	#N/A	#N/A
198	左	left (direction)	1	0.000481	0.955748	Function word	adj	#N/A	0.03846	#N/A
199	校服	school uniform	1	0.000481	0.956229	Clothing	n	#N/A	0.03846	#N/A
200	售貨員	salesperson	1	0.000481	0.95671	Character	n	#N/A	0.03846	#N/A
201	傷殘人士廁所	toilet for disabled people	1	0.000481	0.957191	Places	n	#N/A	0.03846	#N/A
202	穿鞋	wear shoes	1	0.000481	0.957672	Activities	phrase	#N/A	0.03846	#N/A
203	睡覺	sleep	1	0.000481	0.958153	Activities	v	#N/A	0.03846	#N/A
204	下載	download	1	0.000481	0.958634	Activities	v	#N/A	0.03846	#N/A
205	小巴	minibus	1	0.000481	0.959115	Transportation	n	#N/A	0.03846	#N/A
206	返回座位	return to seat	1	0.000481	0.959596	Social expression	phrase	#N/A	0.03846	#N/A
207	排隊等車	queue up for transportation	1	0.000481	0.960077	Activities	phrase	#N/A	0.03846	#N/A
208	入	enter	1	0.000481	0.960558	Activities	v	#N/A	0.03846	#N/A
209	燈	light	1	0.000481	0.961039	Electrical appliances	n	#N/A	0.03846	#N/A
210	蝦	shrimp	1	0.000481	0.96152	Food	n	#N/A	0.03846	#N/A
211	踢波	play soccer	1	0.000481	0.962001	Activities	v	#N/A	0.03846	#N/A
212	百貨公司	department store	1	0.000481	0.962482	Places	n	#N/A	0.03846	#N/A
213	剪指甲	clip nails	1	0.000481	0.962963	Activities	phrase	#N/A	0.03846	#N/A
214	相機	camera	1	0.000481	0.963444	Electrical appliances	n	#N/A	0.03846	#N/A
215	唱歌	sing	1	0.000481	0.963925	Activities	v	#N/A	0.03846	#N/A
216	彈琴	play the piano	1	0.000481	0.964406	Activities	v	#N/A	0.03846	#N/A
217	火腿	ham	1	0.000481	0.964887	Food	n	#N/A	0.03846	#N/A
218	4	4	1	0.000481	0.965368	Function word	adj	#N/A	0.03846	#N/A
219	聖誕花	poinsettia	1	0.000481	0.965849	Festival	n	#N/A	0.03846	#N/A
220	私家車	car	1	0.000481	0.96633	Transportation	n	#N/A	0.03846	#N/A
221	坐好	sit properly	1	0.000481	0.966811	Social expression	phrase	#N/A	0.03846	#N/A
222	戴安全帶	wear seatbelt	1	0.000481	0.967292	Social expression	phrase	#N/A	0.03846	#N/A
223	點頭	nod	1	0.000481	0.967773	Activities	v	#N/A	0.03846	#N/A
224	薯片	potato chips	1	0.000481	0.968254	Food	n	#N/A	0.03846	#N/A
225	八達通咭	octopus card (stored value card used in Hong Kong)	1	0.000481	0.968735	Daily necessities	n	#N/A	0.03846	#N/A
226	簿	notebook	1	0.000481	0.969216	Stationery	n	#N/A	0.03846	#N/A
227	洗髮	wash hair	1	0.000481	0.969697	Activities	v	#N/A	0.03846	#N/A
228	熨斗	iron	1	0.000481	0.970178	Electrical appliances	n	#N/A	0.03846	#N/A
229	鉛筆	pencil	1	0.000481	0.970659	Stationery	n	#N/A	0.03846	#N/A
230	花	flower	1	0.000481	0.97114	Animal&Plants	n	#N/A	0.03846	#N/A
231	紙	paper	1	0.000481	0.971621	Stationery	n	#N/A	0.03846	#N/A
232	難食	unpalatable	1	0.000481	0.972102	Emotional Expression	adj	#N/A	0.03846	#N/A
233	8	8	1	0.000481	0.972583	Function word	adj	#N/A	0.03846	#N/A
234	天壇大佛	Big Buddha (statue in Hong Kong)	1	0.000481	0.973064	Places	n	#N/A	0.03846	#N/A
235	梳化	sofa	1	0.000481	0.973545	Furniture	n	#N/A	0.03846	#N/A
236	玩遊戲	play games	1	0.000481	0.974026	Activities	v	#N/A	0.03846	#N/A
237	毛巾	towel	1	0.000481	0.974507	Daily necessities	n	#N/A	0.03846	#N/A
238	聽電話	answer the phone	1	0.000481	0.974988	Activities	v	#N/A	0.03846	#N/A
239	聖誕慶祝會	Christmas party	1	0.000481	0.975469	Activities	n	#N/A	0.03846	#N/A
240	門	door	1	0.000481	0.97595	Furniture	n	#N/A	0.03846	#N/A
241	輕鐵	light rail	1	0.000481	0.976431	Transportation	n	#N/A	0.03846	#N/A
242	家長日	parent's day	1	0.000481	0.976912	Activities	n	#N/A	0.03846	#N/A
243	公園	park	1	0.000481	0.977393	Places	n	#N/A	0.03846	#N/A
244	6	6	1	0.000481	0.977874	Function word	adj	#N/A	0.03846	#N/A
245	月餅	mooncake	1	0.000481	0.978355	Food	n	#N/A	0.03846	#N/A
246	山頂纜車	cable car	1	0.000481	0.978836	Transportation	n	#N/A	0.03846	#N/A
247	10	10	1	0.000481	0.979317	Function word	adj	#N/A	0.03846	#N/A
248	校長	principal	1	0.000481	0.979798	Character	n	#N/A	0.03846	#N/A
249	雞	chicken	1	0.000481	0.980279	Animal&Plants	n	#N/A	0.03846	#N/A
250	做運動	exercise	1	0.000481	0.98076	Activities	v	#N/A	0.03846	#N/A
251	瓜	gourd	1	0.000481	0.981241	Food	n	#N/A	0.03846	#N/A
252	打乒乓球	play ping pong	1	0.000481	0.981722	Activities	phrase	#N/A	0.03846	#N/A
253	蘿蔔	radish	1	0.000481	0.982203	Food	n	#N/A	0.03846	#N/A
254	檸檬茶	lemon tea	1	0.000481	0.982684	Food	n	#N/A	0.03846	#N/A
255	中秋節	mid-autumn festival	1	0.000481	0.983165	Festival	adv	#N/A	0.03846	#N/A
256	首飾	jewelry	1	0.000481	0.983646	Daily necessities	n	#N/A	0.03846	#N/A
257	佢地	third person plural pronoun	1	0.000481	0.984127	Character	pron	#N/A	0.03846	#N/A
258	明天	tomorrow	1	0.000481	0.984608	Function word	adv	#N/A	#N/A	0.1
259	長袖衫	long-sleeved shirt	1	0.000481	0.985089	Clothing	n	#N/A	#N/A	0.1
260	言語治療師	speech therapist	1	0.000481	0.98557	Character	n	#N/A	#N/A	0.1
261	舉手	raise hand	1	0.000481	0.986051	Social expression	v	#N/A	#N/A	0.1
262	不開心	unhappy	1	0.000481	0.986532	Emotional Expression	adj	#N/A	#N/A	0.1
263	剪腳甲	clip toe nails	1	0.000481	0.987013	Activities	phrase	#N/A	#N/A	0.1
264	凍	cold	1	0.000481	0.987494	Emotional Expression	adj	#N/A	#N/A	0.1
265	燒烤	barbeque	1	0.000481	0.987975	Activities	v	#N/A	#N/A	0.1
266	食藥	take medicine	1	0.000481	0.988456	Activities	phrase	#N/A	#N/A	0.1
267	為甚麼	why	1	0.000481	0.988937	Function word	adv	#N/A	#N/A	0.1
268	豬	pig	1	0.000481	0.989418	Animal&Plants	n	#N/A	#N/A	0.1
269	長褲	pants	1	0.000481	0.989899	Clothing	n	#N/A	#N/A	0.1
270	蝦片	shrimp crackers	1	0.000481	0.99038	Food	n	#N/A	#N/A	0.1
271	揮春	paper decoration for Chinese new year	1	0.000481	0.990861	Festival	n	#N/A	#N/A	0.1
272	7	7	1	0.000481	0.991342	Function word	adj	#N/A	#N/A	0.1
273	醫生	doctor	1	0.000481	0.991823	Character	n	#N/A	#N/A	0.1
274	龜	turtle	1	0.000481	0.992304	Animal&Plants	n	#N/A	#N/A	0.1
275	老鼠	mouse	1	0.000481	0.992785	Animal&Plants	n	#N/A	#N/A	0.1
276	梳頭	comb hair	1	0.000481	0.993266	Activities	v	#N/A	#N/A	0.1
277	而家	now	1	0.000481	0.993747	Function word	adv	#N/A	#N/A	0.1
278	中午	noon	1	0.000481	0.994228	Function word	n	#N/A	#N/A	0.1
279	流鼻水	have a runny nose	1	0.000481	0.994709	Emotional Expression	phrase	#N/A	#N/A	0.1
280	通心粉	macaroni	1	0.000481	0.99519	Food	n	#N/A	#N/A	0.1
281	蘋果	apple	1	0.000481	0.995671	Food	n	#N/A	#N/A	0.1
282	漢堡包	hamburger	1	0.000481	0.996152	Food	n	#N/A	#N/A	0.1
283	郊野公園	nature park	1	0.000481	0.996633	Places	n	#N/A	#N/A	0.1
284	棉花糖	cotton candy	1	0.000481	0.997114	Food	n	0.04	#N/A	#N/A
285	放鬆	relax	1	0.000481	0.997595	Emotional Expression	v	0.04	#N/A	#N/A
286	短褲	shorts	1	0.000481	0.998076	Clothing	n	0.04	#N/A	#N/A
287	憤怒	angry	1	0.000481	0.998557	Emotional Expression	adj	0.04	#N/A	#N/A
288	水鞋	water shoes	1	0.000481	0.999038	Clothing	n	0.04	#N/A	#N/A
289	企	stand	1	0.000481	0.999519	Activities	v	0.04	#N/A	#N/A
290	裙	dress	1	0.000481	1	Clothing	n	0.04	#N/A	#N/A

## Sheet: message
Type	trial_order	username	toUserName	chatContent	final_func	length
UtoU	115	1609LSM	1601HKW	開心	statement	1
UtoU	116	1601HKW	1609LSM	棉花糖	statement	1
UtoU	169	1609LSM	1610CLY	同學,食,朱古力	statement	3
UtoU	170	1610CLY	1609LSM		?	0
UtoU	171	1610CLY	1609LSM	我,汽水	statement	2
UtoU	172	1609LSM	1610CLY	打招呼	convention	1
UtoU	173	1610CLY	1609LSM	打招呼	convention	1
UtoU	174	1609LSM	1610CLY	我,拜拜	convention	2
UtoU	175	1611TKC	1609LSM	放鬆	statement	1
UtoU	176	1611TKC	1609LSM	幫忙,碟	statement	2
UtoU	225	1612HHP	1614TS	我,食,麵包,燒賣,,	statement	4
UtoU	226	1614TS	1612HHP	你,食,甚麼,,,	question	3
UtoU	227	1614TS	1612HHP	你,飲,甚麼,,,	question	3
UtoU	228	1614TS	1612HHP	開心,,,,,	statement	1
UtoU	229	1612HHP	1614TS	我,食,飯,,,	response	3
UtoU	230	1614TS	1612HHP	你,,,,,	statement	1
UtoU	231	1615LTS	1616LCF	你,,,,,	question	1
UtoU	232	1616LCF	1615LTS	我,食,麵包,,,	response	3
UtoU	233	1615LTS	1614TS	你,坐,飯,,,	statement	3
UtoU	234	1614TS	1615LTS	我,飲,茶,,,	statement	3
UtoU	235	1615LTS	1614TS	你,飲,甚麼,,,	question	3
UtoU	236	1614TS	1615LTS	我,食,麵包,燒賣,,	statement	4
UtoU	237	1615LTS	1614TS	你,飲,甚麼,,,	question	3
UtoU	238	1614TS	1615LTS	我,飲,水,牛奶,茶,	response	5
UtoU	239	1615LTS	1614TS	我,飲,水,茶,牛奶,	statement	5
UtoU	240	1615LTS	1614TS	我,食,麵包,燒賣,,	statement	4
UtoU	241	1614TS	1615LTS	你,飲,食,甚麼,,	question	4
UtoU	242	1615LTS	1614TS	,,,,,	?	0
UtoU	243	1615LTS	1614TS	馬,憤怒,生病,碗,害怕,	?	5
UtoU	244	1614TS	1615LTS	馬,水鞋,生病,嘔,,	?	4
UtoU	245	1617TLC	1613YWS	你,飲,食,甚麼,,	question	4
UtoU	246	1613YWS	1617TLC	你,飲,食,甚麼,,	question	4
UtoU	247	1613YWS	1617TLC	我,食,燒賣,麵包,,	statement	4
UtoU	248	1617TLC	1613YWS	我,食,燒賣,麵包,,	response	4
UtoU	249	1617TLC	1613YWS	我,飲,水,茶,牛奶,	statement	5
UtoU	250	1613YWS	1617TLC	我,飲,茶,水,牛奶,	statement	5
UtoU	251	1616LCF	1614TS	你,飲,食,甚麼,,	question	4
UtoU	252	1614TS	1616LCF	你,企,飲,食,甚麼,	question	5
UtoU	253	1614TS	1616LCF	甚麼,,,,,	question	1
UtoU	254	1616LCF	1614TS	我,食,麵包,燒賣,,	response	4
UtoU	255	1614TS	1616LCF	我,食,燒賣,麵包,,	response	4
UtoU	256	1616LCF	1614TS	我,飲,茶,牛奶,水,	response	5
UtoU	257	1614TS	1616LCF	我,飲,牛奶,水,茶,	response	5
UtoU	258	1616LCF	1614TS	馬,裙,,,,	?	2
UtoU	259	1614TS	1616LCF	短褲,羊,,,,	?	2
UtoU	260	1613YWS	1614TS	我,,,,,	statement	1
UtoU	261	1614TS	1613YWS	你,,,,,	statement	1
UtoU	262	1614TS	1615LTS	我,你,,,,	statement	2
UtoU	263	1614TS	1615LTS	甚麼,,,,,	question	1
UtoU	264	1614TS	1615LTS	我,,,,,	statement	1
UtoU	265	1614TS	1615LTS	甚麼,,,,,	question	1
UtoU	330	1614TS	1612HHP	你,食,甚麼,,,	question	3
UtoU	331	1612HHP	1614TS	我,食,燒賣,,,	response	3
UtoU	332	1612HHP	1614TS	媽媽,,,,,	statement	1
UtoU	333	1612HHP	1614TS	你,飲,碗,,,	statement	3
UtoU	334	1613YWS	1616LCF	你,食,甚麼,,,	question	3
UtoU	335	1616LCF	1613YWS	我,食,麵包,,,	response	3
UtoU	336	1616LCF	1613YWS	,,,,,	?	0
UtoU	337	1616LCF	1613YWS	我,,,,,	statement	1
UtoU	338	1616LCF	1613YWS	我,,,,,	statement	1
UtoU	340	1616LCF	1613YWS	我,飲,水,,,	statement	3
UtoU	344	1616LCF	1613YWS	牛奶,,,,,	statement	1
UtoU	345	1616LCF	1617TLC	甚麼,,,,,	question	1
UtoU	346	1616LCF	1617TLC	甚麼,,,,,	question	1
UtoU	347	1616LCF	1617TLC	我,開心,,,,	statement	2
UtoU	348	1616LCF	1617TLC	我,開心,,,,	?	2
UtoU	349	1617TLC	1616LCF	同學,,,,,	statement	1
UtoU	350	1616LCF	1617TLC	我,開心,,,,	statement	2
UtoU	351	1617TLC	1616LCF	同學,開心,,,,	statement	2
UtoU	352	1616LCF	1617TLC	我,食,,,,	question	2
UtoU	353	1616LCF	1617TLC	甚麼,,,,,	question	1
UtoU	354	1617TLC	1616LCF	我,開心,,,,	statement	2
UtoU	355	1616LCF	1617TLC	我,行,學校,,,	statement	3
UtoU	356	1617TLC	1616LCF	甚麼,,,,,	question	1
UtoU	357	1616LCF	1617TLC	食,餅乾,,,,	response	2
UtoU	358	1617TLC	1616LCF	悶,,,,,	statement	1
UtoU	359	1616LCF	1617TLC	牛,,,,,	statement	1
UtoU	360	1616LCF	1617TLC	打招呼,,,,,	convention	1
UtoU	361	1616LCF	1617TLC	牛,,,,,	statement	1
UtoU	362	1616LCF	1617TLC	打招呼,,,,,	convention	1
UtoU	363	1616LCF	1617TLC	一起玩耍,,,,,	statement	1
UtoU	1032	1613YWS	1614TS	害怕	statement	1
UtoU	1033	1614TS	1613YWS	不明白	response	1
UtoU	1035	1613YWS	1614TS	我,鍾意,朱古力	statement	3
UtoU	1039	1613YWS	1614TS	你,鍾意,食,甚麼	question	4
UtoU	1041	1613YWS	1614TS	打招呼	convention	1
UtoU	1042	1614TS	1613YWS	我,鍾意,蛋糕,或者,麵	response	5
UtoU	1044	1613YWS	1614TS	我,鍾意,食,麵包	statement	4
UtoU	1046	1614TS	1613YWS	我地,約期,上街,食飯	question	4
UtoU	1047	1613YWS	1614TS	知道,拜拜	response	2
UtoU	1048	1614TS	1613YWS	拜拜	convention	1
UtoU	1049	1614TS	1613YWS	打招呼	convention	1
UtoU	1051	1613YWS	1614TS	打招呼	convention	1
UtoU	1053	1614TS	1613YWS	你,鍾意,食	statement	3
UtoU	1064	1613YWS	1614TS	打招呼	convention	1
UtoU	1066	1614TS	1613YWS	打招呼	convention	1
UtoU	1068	1613YWS	1614TS	你,鍾意,食,甚麼	question	4
UtoU	1071	1614TS	1613YWS	我,鍾意,腸粉	response	3
UtoU	1075	1613YWS	1614TS	我地,約期,食飯	question	3
UtoU	1076	1614TS	1613YWS	知道	response	1
UtoU	1077	1613YWS	1614TS	拜拜	convention	1
UtoU	1080	1614TS	1613YWS	拜拜	convention	1
UtoU	1081	1614TS	1613YWS	你,買,甚麼	question	3
UtoU	1082	1614TS	1613YWS	你,靚	statement	2
UtoU	1084	1613YWS	1614TS	我,開心	statement	2
UtoU	1085	1614TS	1613YWS	拜拜	convention	1
UtoU	1086	1613YWS	1614TS	拜拜	convention	1
UtoU	1088	1613YWS	1614TS	你,靚	statement	2
UtoU	1091	1614TS	1613YWS	我,開心	statement	2
UtoU	1093	1613YWS	1614TS	拜拜	convention	1
UtoU	1095	1614TS	1613YWS	拜拜	convention	1
UtoU	1099	1613YWS	1614TS	你,靚	statement	2
UtoU	1102	1614TS	1613YWS	我,開心	statement	2
UtoU	1104	1613YWS	1614TS	拜拜	convention	1
UtoU	1106	1614TS	1613YWS	拜拜	convention	1
UtoU	1116	1612HHP	1614TS	打招呼	convention	1
UtoU	1118	1612HHP	1614TS	你,開心	statement	2
UtoU	1121	1614TS	1612HHP	打招呼	convention	1
UtoU	1124	1612HHP	1614TS	我,鍾意,食,飯	statement	4
UtoU	1135	1614TS	1612HHP	我,腸粉	statement	2
UtoU	1138	1612HHP	1614TS	我,拜拜	convention	2
UtoU	1142	1614TS	1612HHP	我,知道	response	2
UtoU	1147	1613YWS	1614TS	我,鍾意,食,餅乾	statement	4
UtoU	1155	1614TS	1613YWS	拜拜	convention	1
UtoU	1447	1612HHP	1613YWS	你,買,甚麼	question	3
UtoU	1451	1613YWS	1612HHP	我,買,波鞋	response	3
UtoU	1463	1612HHP	1613YWS	你,鍾意,甚麼	question	3
UtoU	1464	1613YWS	1612HHP	我,去,酒樓	response	3
UtoU	1465	1613YWS	1612HHP	我,食,燒賣	response	3
UtoU	1484	1613YWS	1612HHP	你,買,甚麼	question	3
UtoU	1487	1612HHP	1613YWS	我,買,雞翼	response	3
UtoU	1490	1613YWS	1612HHP	我,食,麵包	statement	3
UtoU	1491	1612HHP	1613YWS	我,悶	statement	2
UtoU	1497	1612HHP	1613YWS	我,鍾意,食,狗	statement	4
UtoU	1526	1612HHP	1613YWS	你,打招呼	convention	2
UtoU	1527	1613YWS	1612HHP	我,開心	statement	2
UtoU	1528	1613YWS	1612HHP	你,鍾意,誰	question	3
UtoU	1529	1612HHP	1613YWS	你	response	1
UtoU	1530	1613YWS	1612HHP	我,開心	statement	2
UtoU	1531	1613YWS	1612HHP	你,去,哪裡,拍拖	question	4
UtoU	1532	1612HHP	1613YWS	餐廳	response	1
UtoU	1533	1613YWS	1612HHP	你,食,甚麼	question	3
UtoU	1534	1612HHP	1613YWS	芝士,意大利粉	response	2
UtoU	1535	1613YWS	1612HHP	OK	response	1
UtoU	1536	1613YWS	1612HHP	你,鍾意,飲,甚麼	question	4
UtoU	1537	1612HHP	1613YWS	益力多,好食	response	2
UtoU	1538	1613YWS	1612HHP	我,買,益力多	statement	3
UtoU	1539	1612HHP	1613YWS	你,復活節,做甚麼	question	3
UtoU	1540	1612HHP	1613YWS	超級市場,入面,益力多	response	3
UtoU	1541	1613YWS	1612HHP	我,去,玩玩具	response	3
UtoU	1542	1613YWS	1612HHP	我地,約期,上街	question	3
UtoU	1543	1612HHP	1613YWS	我,OK,開心	response	3
UtoU	1544	1613YWS	1612HHP	拜拜	convention	1
UtoU	1802	1914KSY	1917LTC	你好	convention	1
UtoU	1803	1917LTC	1914KSY	上午,食,甚麼	question	3
UtoU	1804	1914KSY	1917LTC	麵	response	1
UtoU	1805	1917LTC	1914KSY	蛋糕	statement	1
UtoU	1806	1914KSY	1917LTC	你,甚麼	question	2
UtoU	1807	1917LTC	1914KSY	我,食,蛋糕	response	3
UtoU	1808	1914KSY	1917LTC	肥	response	1
UtoU	1809	1914KSY	1917LTC	你,一起玩耍,手提電話	question	3
UtoU	1810	1917LTC	1914KSY	你,肥,我	statement	3
UtoU	1811	1917LTC	1914KSY	OK	response	1
UtoU	1812	1914KSY	1917LTC	你,母親節,做甚麼	question	3
UtoU	1813	1917LTC	1914KSY	飲茶	response	1
UtoU	1814	1914KSY	1917LTC	我,去,酒樓	statement	3
UtoU	1815	1917LTC	1914KSY	買,蛋糕	response	2
UtoU	1816	1914KSY	1917LTC	媽媽,爺爺／公公,嫲嫲／婆婆	?	3
UtoU	1817	1917LTC	1914KSY	爸爸,媽媽,弟弟,弟弟,嫲嫲／婆婆	?	5
UtoU	1818	1914KSY	1917LTC	甚麼,蛋糕	question	2
UtoU	1819	1917LTC	1914KSY	芝士,藍色,士多啤梨,蛋糕	response	4
UtoU	1820	1914KSY	1917LTC	我,鍾意,朱古力,蛋糕	statement	4
UtoU	1821	1917LTC	1914KSY	鍾意,芒果,蛋糕	statement	3
UtoU	1822	1917LTC	1914KSY	拜拜	convention	1
UtoU	1823	1914KSY	1917LTC	你,談話,開心	statement	3
UtoU	1824	1917LTC	1914KSY	開心	statement	1
UtoU	1825	1914KSY	1917LTC	你,看電視,夜晚	statement	3
UtoU	1826	1917LTC	1914KSY	你,有,甚麼,談話,嗎	question	5
UtoU	1827	1917LTC	1914KSY	有	response	1
UtoU	1828	1917LTC	1914KSY	拜拜	convention	1
UtoU	1829	1914KSY	1917LTC	拜拜	convention	1
UtoU	1874	1609LSM	1908CCK	你好	convention	1
UtoU	1875	1908CCK	1609LSM	你,你好	convention	2
UtoU	1876	1609LSM	1908CCK	玩電腦	statement	1
UtoU	1877	1908CCK	1609LSM	聽歌	statement	1
UtoU	1878	1908CCK	1609LSM	慢慢行	statement	1
UtoU	1879	1609LSM	1908CCK	OK	response	1
UtoU	1880	1908CCK	1609LSM	薯條	statement	1
UtoU	1881	1609LSM	1908CCK	魚蛋,香腸	statement	2
UtoU	1882	1908CCK	1609LSM	鍾意,飲,可樂	statement	3
UtoU	1883	1609LSM	1908CCK	益力多,麥精	statement	2
UtoU	1884	1608LKH	1609LSM	你好,你好	convention	2
UtoU	1885	1609LSM	1608LKH	雪糕	statement	1
UtoU	1886	1608LKH	1609LSM	零食鋪	statement	1
UtoU	1887	1608LKH	1609LSM	可樂	statement	1
UtoU	1888	1609LSM	1608LKH	看醫生	statement	1
UtoU	1889	1609LSM	1608LKH	拜拜	convention	1
UtoU	1890	1610CLY	1907CMC	文化中心	statement	1
UtoU	1891	1610CLY	1907CMC	打招呼	convention	1
UtoU	1892	1907CMC	1610CLY	做甚麼	question	1
UtoU	1894	1907CMC	1610CLY	開心,問句	question	2
UtoU	1897	1907CMC	1610CLY	拜拜	convention	1
UtoU	2007	1902YL	1906HYN	你好	convention	1
UtoU	2008	1906HYN	1902YL	你好	convention	1
UtoU	2009	1902YL	1906HYN	你好	convention	1
UtoU	2010	1902YL	1906HYN	你好	?	1
UtoU	2011	1906HYN	1902YL	你好	convention	1
UtoU	2012	1902YL	1906HYN	拜拜,粥	convention	2
UtoU	2013	1902YL	1906HYN	廁所	statement	1
UtoU	2016	1906HYN	1902YL	你好	convention	1
UtoU	2017	1902YL	1906HYN	爸爸	statement	1
UtoU	2018	1906HYN	1902YL	爸爸	statement	1
UtoU	2019	1902YL	1906HYN	哥哥,爸爸	statement	2
UtoU	2020	1906HYN	1902YL	哥哥,爸爸	statement	2
UtoU	2021	1902YL	1903CHY	你好	statement	1
UtoU	2022	1906HYN	1902YL	姐姐,爸爸,媽媽	statement	3
UtoU	2023	1903CHY	1902YL	你好	convention	1
UtoU	2024	1903CHY	1902YL	拜拜	convention	1
UtoU	2129	1905LYY	1904MKL	你好	convention	1
UtoU	2132	1904MKL	1905LYY	你好	convention	1
UtoU	2133	1905LYY	1904MKL	你,鍾意,食,甚麼	question	4
UtoU	2136	1904MKL	1905LYY	我要,食,蝦條,麵,香蕉	response	5
UtoU	2138	1905LYY	1904MKL	我,鍾意,食,蛋卷,啫喱	statement	5
UtoU	2141	1904MKL	1905LYY	我要,飲,橙汁,水,蘋果汁	response	5
UtoU	2142	1905LYY	1904MKL	我,鍾意,菊花茶,紙包果汁,益力多	statement	5
UtoU	2144	1905LYY	1904MKL	拜拜	convention	1
UtoU	2146	1904MKL	1905LYY	你好	convention	1
UtoU	2147	1905LYY	1904MKL	你好	convention	1
UtoU	2150	1904MKL	1905LYY	拜拜	convention	1
UtoU	2151	1904MKL	1905LYY	你,鍾意,去,哪裡	question	4
UtoU	2154	1905LYY	1904MKL	我,鍾意,學校	response	3
UtoU	2155	1905LYY	1904MKL	你,嗎	question	2
UtoU	2156	1904MKL	1905LYY	我,鍾意,去,服裝店	response	4
UtoU	2157	1905LYY	1904MKL	襪,嗎	question	2
UtoU	2158	1904MKL	1905LYY	是	response	1
UtoU	2159	1904MKL	1905LYY	鍾意,狗,嗎	question	3
UtoU	2160	1905LYY	1904MKL	鍾意	response	1
UtoU	2161	1905LYY	1904MKL	鍾意,樹,嗎	question	3
UtoU	2162	1904MKL	1905LYY	鍾意	response	1
UtoU	2163	1904MKL	1905LYY	鍾意,新年,嗎	question	3
UtoU	2164	1905LYY	1904MKL	鍾意	response	1
UtoU	2165	1905LYY	1904MKL	煙花	question	1
UtoU	2166	1904MKL	1905LYY	鍾意	response	1
UtoU	2167	1905LYY	1904MKL	鍾意	response	1
UtoU	2168	1905LYY	1904MKL	地鐵	question	1
UtoU	2169	1904MKL	1905LYY	鍾意	response	1
UtoU	2170	1905LYY	1904MKL	鍾意,學校,嗎	question	3
UtoU	2171	1904MKL	1905LYY	鍾意	response	1
UtoU	2172	1918WHY	1917LTC	你,開心,嗎	question	3
UtoU	2173	1917LTC	1918WHY	我,OK	response	2
UtoU	2374	1617TLC	1911WWS	你好	convention	1
UtoU	2398	1911WWS	1913CHY	你好	convention	1
UtoU	2399	1913CHY	1911WWS	你好	convention	1
UtoU	2402	1913CHY	1911WWS	開心	statement	1
UtoU	2403	1913CHY	1911WWS	多謝	convention	1
UtoU	2404	1911WWS	1913CHY	多謝	convention	1
UtoU	2406	1913CHY	1911WWS	你,靚	statement	2
UtoU	2408	1911WWS	1913CHY	佢,去,洗手間	statement	3
UtoU	2410	1911WWS	1913CHY	拜拜	convention	1
UtoU	2411	1913CHY	1911WWS	多謝	convention	1
UtoU	2427	1911WWS	1617TLC	你好	convention	1
UtoU	2429	1617TLC	1911WWS	你好	convention	1
UtoU	2432	1911WWS	1617TLC	你好	convention	1
UtoU	2436	1911WWS	1617TLC	你好	convention	1
UtoU	2437	1911WWS	1617TLC	你好	?	1
UtoU	2438	1911WWS	1617TLC	機械人,遊戲機,或者	statement	3
UtoU	2440	1903CHY	1902YL	你好	convention	1
UtoU	2441	1902YL	1903CHY	你好	convention	1
UtoU	2442	1903CHY	1902YL	一起玩耍	question	1
UtoU	2443	1903CHY	1902YL	嗎	question	1
UtoU	2551	1602IKK	1901TTT	你好	convention	1
UtoU	2552	1901TTT	1602IKK	你好	convention	1
UtoU	2553	1602IKK	1901TTT	你好	convention	1
UtoU	2554	1901TTT	1602IKK	我,食,雞脾	statement	3
UtoU	2555	1602IKK	1901TTT	我,食,燒賣	statement	3
UtoU	2556	1602IKK	1901TTT	我,食,雞脾	statement	3
UtoU	2557	1602IKK	1901TTT	錢	statement	1
UtoU	2558	1602IKK	1901TTT	我,食,雞脾	statement	3
UtoU	2559	1602IKK	1901TTT	我,食,蛋卷	statement	3
UtoU	2560	1602IKK	1901TTT	我,食,香腸	statement	3
UtoU	2561	1602IKK	1901TTT	我,食,粽	statement	3
UtoU	2562	1901TTT	1602IKK	我,飲,牛奶	statement	3
UtoU	2563	1602IKK	1901TTT	我,飲,蘋果汁,好食	statement	4
UtoU	2564	1602IKK	1901TTT	我,打招呼	convention	2
UtoU	2565	1602IKK	1901TTT	一起玩耍	question	1
UtoU	2566	1901TTT	1602IKK	OK	response	1
UtoU	2567	1602IKK	1901TTT	我,食,雞脾	statement	3
UtoU	2568	1602IKK	1901TTT	商場,右,食,蝦條	statement	4
UtoU	2569	1901TTT	1602IKK	酒樓,食,牛肉	statement	3
UtoU	2570	1602IKK	1901TTT	我,食,雞翼	statement	3
UtoU	2571	1602IKK	1901TTT	記得,食,肉	statement	3
UtoU	2572	1901TTT	1602IKK	多謝	convention	1
UtoU	2573	1602IKK	1901TTT	多謝,哥哥,有,睡房,收拾玩具	statement	5
UtoU	2574	1901TTT	1602IKK	拜拜	convention	1
UtoU	2575	1602IKK	1901TTT	我,食,肉	statement	3
UtoU	2576	1901TTT	1602IKK	你好	convention	1
UtoU	2577	1602IKK	1901TTT	我,食,腸粉,牛肉	statement	4
UtoU	2578	1602IKK	1901TTT	你,買,機械人,遊戲機	statement	4
UtoU	2579	1602IKK	1901TTT	不明白,媽媽	response	2
UtoU	2580	1602IKK	1901TTT	你好	convention	1
UtoU	2581	1602IKK	1901TTT	拜拜,姐姐	convention	2
UtoU	2582	1602IKK	1901TTT	你好	convention	1
UtoU	2583	1602IKK	1901TTT	你好	?	1
UtoU	2584	1602IKK	1901TTT	拜拜	convention	1
UtoU	2585	1602IKK	1901TTT	你好	convention	1
UtoU	2586	1602IKK	1901TTT	我,食,燒賣	statement	3
UtoU	2587	1602IKK	1901TTT	我,食,燒賣	?	3
UtoU	2588	1602IKK	1901TTT	你好	convention	1
UtoU	2589	1602IKK	1901TTT	你好	?	1
UtoU	2590	1602IKK	1901TTT	我,食,蛋糕	statement	3
UtoU	2591	1602IKK	1901TTT	我,食,蛋糕	?	3
UtoU	2592	1901TTT	1602IKK	你好	convention	1
UtoU	2593	1901TTT	1602IKK	OK	statement	1
UtoU	2594	1901TTT	1602IKK	你好	convention	1
UtoU	2595	1602IKK	1901TTT	我,食,燒賣	statement	3
UtoU	2596	1901TTT	1602IKK	你好	convention	1
UtoU	2597	1901TTT	1602IKK	你好	?	1
UtoU	2598	1901TTT	1602IKK	我,食,雞脾	statement	3
UtoU	2599	1901TTT	1602IKK	我,食,雞脾	?	3
UtoU	2600	1602IKK	1901TTT	我,食,雞脾	statement	3
UtoU	2601	1602IKK	1901TTT	我,食,雞脾	?	3
UtoU	2602	1602IKK	1901TTT	我,食,雞脾	?	3
UtoU	2603	1602IKK	1901TTT	打招呼	convention	1
UtoU	2604	1602IKK	1901TTT	OK	statement	1
UtoU	2605	1602IKK	1901TTT	你好	convention	1
UtoU	2606	1602IKK	1901TTT	你好	?	1
UtoU	2607	1602IKK	1901TTT	我,食,雞脾	statement	3
UtoU	2608	1602IKK	1901TTT	拜拜	convention	1
UtoU	2609	1602IKK	1901TTT	拜拜	?	1
UtoU	2610	1602IKK	1901TTT	拜拜	?	1
UtoU	2611	1901TTT	1602IKK	拜拜	convention	1
UtoU	2612	1602IKK	1901TTT	拜拜	convention	1
UtoU	2613	1901TTT	1602IKK	拜拜	convention	1
UtoU	2614	1901TTT	1602IKK	拜拜	?	1
UtoU	2615	1602IKK	1901TTT	拜拜	convention	1
UtoU	2616	1602IKK	1901TTT	拜拜	?	1
UtoU	2617	1602IKK	1901TTT	拜拜	?	1
UtoU	2618	1602IKK	1901TTT	拜拜	?	1
UtoU	2687	1614TS	1615LTS	打招呼	convention	1
UtoU	2689	1615LTS	1614TS	你好	convention	1
UtoU	2693	1614TS	1615LTS	你,鍾意,食	question	3
UtoU	2694	1615LTS	1614TS	雪糕	response	1
UtoU	2696	1614TS	1615LTS	我,薄餅	statement	2
UtoU	2697	1615LTS	1614TS	我,拜拜	convention	2
UtoU	2763	1614TS	1615LTS	你,打招呼	convention	2
UtoU	2764	1614TS	1615LTS	你,去,哪裡	question	3
UtoU	2765	1615LTS	1614TS	我,打招呼,幫忙	response	3
UtoU	2766	1615LTS	1614TS	快餐店,食,麵包	response	3
UtoU	2769	1615LTS	1614TS	我,飲,蘋果汁	statement	3
UtoU	2772	1614TS	1615LTS	你,廳,做甚麼	question	3
UtoU	2775	1615LTS	1614TS	商場,食,麵包,塗,花生醬	response	5
UtoU	2779	1615LTS	1614TS	我,塗,麵包,塗,花生醬	response	5
UtoU	2780	1614TS	1615LTS	餐廳	?	1
UtoU	2785	1615LTS	1614TS	我,行,酒樓,食飯	statement	4
UtoST	266	1613YWS	ST01	開心	statement	1
STtoU	267	ST01	1613YWS	我,飲	statement	2
STtoU	268	ST01	1613YWS	你,悶	statement	2
UtoST	269	1613YWS	ST01	你,開心	statement	2
STtoU	270	ST01	1613YWS	我,打招呼	convention	2
STtoU	271	ST01	1613YWS	我,打招呼	?	2
UtoST	272	1613YWS	ST01	打招呼	convention	1
STtoU	273	ST01	1613YWS	一起玩耍	question	1
UtoST	274	1613YWS	ST01	一起玩耍	response	1
STtoU	275	ST01	1613YWS	你,食,叉燒包	statement	3
STtoU	276	ST01	1613YWS	你,飲,叉燒包,腸粉,牛肉	statement	5
UtoST	277	1613YWS	ST01	我,食,牛肉	response	3
STtoU	278	ST01	1613YWS	你,飲,茶	statement	3
UtoST	280	1613YWS	ST01	拜拜	convention	1
UtoST	281	1613YWS	ST01	拜拜	convention	1
STtoU	282	ST01	1613YWS	拜拜	convention	1
STtoU	283	ST01	1613YWS	我,打招呼	convention	2
UtoST	284	1613YWS	ST01	職業治療師,開心	statement	2
UtoST	285	1613YWS	ST01		?	0
STtoU	286	ST01	1613YWS	你,食,通心粉	statement	3
UtoST	287	1613YWS	ST01	我,食,腸粉	statement	3
STtoU	288	ST01	1613YWS	我,食,雞蛋	statement	3
STtoU	289	ST01	1613YWS	你,飲,水,開心	statement	4
UtoST	290	1613YWS	ST01	飯,開心,哥哥,波	statement	4
UtoST	291	1613YWS	ST01		?	0
STtoU	292	ST01	1613YWS	我,看書	statement	2
UtoST	293	1613YWS	ST01	我,開心	statement	2
UtoST	294	1613YWS	ST01		?	0
UtoST	295	1613YWS	ST01		?	0
UtoST	296	1613YWS	ST01		?	0
UtoST	297	1613YWS	ST01	拜拜	convention	1
STtoU	298	ST01	1613YWS	拜拜	convention	1
UtoST	299	1613YWS	ST01	打招呼	convention	1
STtoU	300	ST01	1613YWS	打招呼,開心	convention	2
UtoST	301	1613YWS	ST01	我,食,腸粉,牛肉	statement	4
STtoU	302	ST01	1613YWS	我,食,雞脾	statement	3
UtoST	303	1613YWS	ST01	你,飲	question	2
STtoU	304	ST01	1613YWS	我,飲,麥精,維他奶	response	4
STtoU	305	ST01	1613YWS	你,飲	question	2
UtoST	306	1613YWS	ST01	我,飲,水	response	3
STtoU	307	ST01	1613YWS	你,開心	question	2
UtoST	308	1613YWS	ST01	我,開心	response	2
UtoST	309	1613YWS	ST01	你,食	question	2
STtoU	310	ST01	1613YWS	蛋撻	response	1
UtoST	311	1613YWS	ST01		?	0
UtoST	312	1613YWS	ST01		?	0
UtoST	313	1613YWS	ST01	我,食,餅乾	statement	3
STtoU	314	ST01	1613YWS	拜拜	convention	1
STtoU	315	ST01	1613YWS		?	0
UtoST	316	1613YWS	ST01		?	0
UtoST	317	1613YWS	ST01	我,拜拜	convention	2
STtoU	339	ST01	1612HHP	長袖衫,醫生,,,,	statement	2
UtoST	341	1612HHP	ST01	哥哥,行,雞,,,	?	3
STtoU	342	ST01	1612HHP	甚麼,龜,,,,	response	2
STtoU	343	ST01	1612HHP	不明白,老鼠,,,,	response	2
STtoU	371	ST01	1614TS	你,,,,,	statement	1
UtoST	372	1614TS	ST01	羊,,,,,	?	1
UtoST	373	1614TS	ST01	媽媽,弟弟,,,,	statement	2
UtoST	374	1614TS	ST01	媽媽,,,,,	statement	1
STtoU	1697	ST02	1918WHY	你好	convention	1
UtoST	1698	1918WHY	ST02	你好	convention	1
STtoU	1700	ST02	1918WHY	你好	convention	1
UtoST	1701	1918WHY	ST02	你好	convention	1
STtoU	1702	ST02	1918WHY	你,剛才,做甚麼	question	3
UtoST	1703	1918WHY	ST02	我,上課	response	2
STtoU	1704	ST02	1918WHY	有,無,留心聽	question	3
UtoST	1705	1918WHY	ST02	有	response	1
STtoU	1706	ST02	1918WHY	做得好	response	1
STtoU	1707	ST02	1918WHY	拜拜	convention	1
UtoST	1708	1918WHY	ST02	拜拜	convention	1
STtoU	1709	ST02	1918WHY	你好	convention	1
UtoST	1710	1918WHY	ST02	你好	convention	1
STtoU	1711	ST02	1918WHY	你,鍾意,食,甚麼	question	4
UtoST	1712	1918WHY	ST02	蝦	response	1
STtoU	1713	ST02	1918WHY	你,鍾意,去,哪裡	question	4
UtoST	1714	1918WHY	ST02	我,媽媽,美食廣場	response	3
STtoU	1715	ST02	1918WHY	你,鍾意,做甚麼	question	3
UtoST	1716	1918WHY	ST02	玩電腦	response	1
STtoU	1717	ST02	1918WHY	OK,拜拜	response	2
UtoST	1718	1918WHY	ST02	OK,拜拜	convention	2
STtoU	1719	ST02	1918WHY	你好	convention	1
UtoST	1720	1918WHY	ST02	你好	convention	1
UtoST	1721	1918WHY	ST02	你好	convention	1
STtoU	1722	ST02	1918WHY	你,昨天,去,哪裡	question	4
UtoST	1723	1918WHY	ST02	廳	response	1
STtoU	1724	ST02	1918WHY	OK	response	1
STtoU	1725	ST02	1918WHY	做甚麼	question	1
UtoST	1726	1918WHY	ST02	OK	response	1
STtoU	1727	ST02	1918WHY	做甚麼	question	1
UtoST	1728	1918WHY	ST02	上課	response	1
STtoU	1729	ST02	1918WHY	做得好	response	1
STtoU	1730	ST02	1918WHY	開心	statement	1
UtoST	1731	1918WHY	ST02	開心	statement	1
STtoU	1732	ST02	1918WHY	我,昨天,去,郊野公園	statement	4
STtoU	1733	ST02	1918WHY	我,開心	statement	2
UtoST	1734	1918WHY	ST02	你	statement	1
UtoST	1735	1918WHY	ST02	我	statement	1
UtoST	1736	1918WHY	ST02	我,玩電腦	statement	2
STtoU	1737	ST02	1918WHY	OK,拜拜	response	2
UtoST	1738	1918WHY	ST02	拜拜	convention	1
STtoU	1739	ST02	1915LWJ	你好	convention	1
UtoST	1740	1915LWJ	ST02	你好	convention	1
STtoU	1741	ST02	1915LWJ	你,剛才,做甚麼	question	3
UtoST	1742	1915LWJ	ST02	我,玩遊戲	response	2
STtoU	1743	ST02	1915LWJ	你,開心	question	2
UtoST	1744	1915LWJ	ST02	我,OK	response	2
STtoU	1745	ST02	1915LWJ	做得好	response	1
UtoST	1746	1915LWJ	ST02	OK,多謝	convention	2
STtoU	1747	ST02	1915LWJ	拜拜	convention	1
UtoST	1748	1915LWJ	ST02	拜拜	convention	1
STtoU	1749	ST02	1915LWJ	你好	convention	1
UtoST	1750	1915LWJ	ST02	你好	convention	1
STtoU	1751	ST02	1915LWJ	你,鍾意,食,甚麼	question	4
UtoST	1752	1915LWJ	ST02	雪條	response	1
STtoU	1753	ST02	1915LWJ	OK	response	1
STtoU	1754	ST02	1915LWJ	你,昨天,做甚麼	question	3
UtoST	1755	1915LWJ	ST02	踢波	response	1
STtoU	1756	ST02	1915LWJ	開心	statement	1
STtoU	1757	ST02	1915LWJ	拜拜	convention	1
UtoST	1758	1915LWJ	ST02	拜拜	convention	1
STtoU	1759	ST02	1914KSY	你好	convention	1
STtoU	1760	ST02	1914KSY	你好	convention	1
UtoST	1761	1914KSY	ST02	你好	convention	1
STtoU	1762	ST02	1914KSY	你,剛才,做甚麼	question	3
UtoST	1763	1914KSY	ST02	我,上課	response	2
STtoU	1764	ST02	1914KSY	你好	convention	1
UtoST	1765	1914KSY	ST02	你好	convention	1
STtoU	1766	ST02	1914KSY	你,剛才,做甚麼	question	3
STtoU	1767	ST10	1917LTC	你好	convention	1
STtoU	1768	ST10	1917LTC	你好	?	1
UtoST	1769	1917LTC	ST10	你好	convention	1
STtoU	1770	ST10	1917LTC	你,剛才,做甚麼	question	3
UtoST	1771	1914KSY	ST02	我,上課	response	2
STtoU	1772	ST02	1914KSY	有,無,留心聽	question	3
UtoST	1773	1917LTC	ST10	我,上課	response	2
STtoU	1774	ST10	1917LTC	有,無,留心聽	question	3
UtoST	1775	1914KSY	ST02	有	response	1
UtoST	1776	1917LTC	ST10	有	response	1
STtoU	1777	ST02	1914KSY	做得好	response	1
STtoU	1778	ST10	1917LTC	做得好	response	1
STtoU	1779	ST02	1914KSY	拜拜	convention	1
STtoU	1780	ST10	1917LTC	拜拜	convention	1
UtoST	1781	1917LTC	ST10	拜拜	convention	1
UtoST	1782	1914KSY	ST02	拜拜	convention	1
STtoU	1783	ST02	1914KSY	你好	convention	1
UtoST	1784	1914KSY	ST02	你好	convention	1
STtoU	1785	ST10	1917LTC	你好	convention	1
STtoU	1786	ST10	1917LTC	你,鍾意,食,甚麼	question	4
STtoU	1787	ST02	1914KSY	你,鍾意,食,甚麼	question	4
UtoST	1788	1917LTC	ST10	蛋撻	response	1
STtoU	1789	ST10	1917LTC	你,鍾意,去,哪裡	question	4
UtoST	1790	1917LTC	ST10	百貨公司	response	1
STtoU	1791	ST10	1917LTC	你,鍾意,做甚麼	question	3
UtoST	1792	1917LTC	ST10	聽歌	response	1
UtoST	1793	1914KSY	ST02	菜	response	1
STtoU	1794	ST10	1917LTC	OK,拜拜	response	2
STtoU	1795	ST02	1914KSY	你,鍾意,去,哪裡	question	4
UtoST	1796	1917LTC	ST10	拜拜	convention	1
UtoST	1797	1914KSY	ST02	酒樓	response	1
STtoU	1798	ST02	1914KSY	你,鍾意,做甚麼	question	3
UtoST	1799	1914KSY	ST02	我,鍾意,做運動	response	3
STtoU	1800	ST02	1914KSY	OK,拜拜	convention	2
UtoST	1801	1914KSY	ST02	OK,拜拜	convention	2
STtoU	1850	ST03	1607TCK	你,去,哪裡,食,飯	question	5
STtoU	1851	ST04	1604TTM	你好	convention	1
UtoST	1852	1607TCK	ST03	餐廳	response	1
UtoST	1853	1604TTM	ST04	你好,你好,你好	convention	3
STtoU	1854	ST03	1607TCK	你,食,甚麼	question	3
STtoU	1855	ST04	1604TTM	去,哪裡,食,問句	question	4
UtoST	1856	1607TCK	ST03	燒賣	response	1
STtoU	1857	ST03	1607TCK	你,去,哪裡,食,飯	question	5
UtoST	1858	1604TTM	ST04	你好,酒樓	response	2
STtoU	1859	ST04	1604TTM	食,甚麼	question	2
UtoST	1860	1607TCK	ST03	廁所,酒樓	response	2
UtoST	1861	1604TTM	ST04	雞蛋	response	1
STtoU	1862	ST03	1607TCK	你,食,甚麼	question	3
STtoU	1863	ST04	1604TTM	飲,甚麼	question	2
UtoST	1865	1604TTM	ST04	飲,飲,飲,橙汁,橙汁,維他奶	response	3
STtoU	1866	ST03	1607TCK	你好	convention	1
UtoST	1867	1607TCK	ST03	你好	convention	1
STtoU	1868	ST03	1607TCK	你,食,甚麼	question	3
UtoST	1869	1604TTM	ST04	拜拜	convention	1
UtoST	1870	1607TCK	ST03	雪糕	response	1
STtoU	1871	ST03	1607TCK	OK,拜拜	convention	2
STtoU	1872	ST04	1604TTM	你好	convention	1
UtoST	1873	1607TCK	ST03	拜拜	convention	1
UtoST	1898	1908CCK	ST04	我	statement	1
UtoST	1899	1908CCK	ST04	我	?	1
UtoST	1900	1605HCN	ST04	爸爸,你好	convention	2
STtoU	1901	ST04	1605HCN	你好	convention	1
STtoU	1902	ST03	1606WHW	你好	convention	1
STtoU	1903	ST04	1605HCN	你,去,哪裡,食,飯	question	5
STtoU	1904	ST04	1605HCN	洗／抹面	statement	1
UtoST	1905	1605HCN	ST04	錢,毛巾	statement	2
STtoU	1906	ST04	1605HCN	鍾意,飲,甚麼	question	3
UtoST	1907	1605HCN	ST04	益力多	response	1
UtoST	1908	1606WHW	ST03	食飯	statement	1
UtoST	1909	1605HCN	ST04	幫忙,聽電話	statement	2
STtoU	1910	ST04	1605HCN	你好	convention	1
STtoU	1911	ST03	1606WHW	鍾意,食,蛋糕,嗎	question	4
UtoST	1912	1605HCN	ST04	剪指甲	statement	1
UtoST	1913	1606WHW	ST03	好食	response	1
STtoU	1914	ST04	1605HCN	你,鍾意,甚麼	question	3
STtoU	1915	ST03	1606WHW	益力多,或者,水	question	3
UtoST	1916	1611TKC	ST05	OK,一起玩耍	statement	2
STtoU	1917	ST05	1611TKC	你好	convention	1
UtoST	1918	1605HCN	ST04	相機,飛機,酒樓,燒賣,麵包	statement	5
UtoST	1919	1606WHW	ST03	蘋果汁	response	1
STtoU	1920	ST04	1605HCN	你好	convention	1
STtoU	1921	ST03	1606WHW	我,鍾意,飲,麥精	statement	4
UtoST	1922	1611TKC	ST05	開心	statement	1
UtoST	1923	1605HCN	ST04	OK	response	1
STtoU	1924	ST04	1605HCN	我,打招呼,開心	statement	3
STtoU	1925	ST03	1606WHW	你,開心,嗎	question	3
STtoU	1926	ST04	1605HCN	我,開心	response	2
UtoST	1927	1611TKC	ST05	橙	statement	1
STtoU	1928	ST04	1605HCN	你,鍾意,甚麼	question	3
UtoST	1929	1605HCN	ST04	唱歌	response	1
STtoU	1930	ST05	1611TKC	好食	response	1
STtoU	1931	ST04	1605HCN	我,鍾意,玩電腦	statement	3
UtoST	1932	1605HCN	ST04	彈琴	statement	1
STtoU	1933	ST04	1605HCN	你,何時,食飯	question	3
UtoST	1934	1606WHW	ST03	一起玩耍	question	1
UtoST	1935	1611TKC	ST05	你,鍾意,一起玩耍	question	3
STtoU	1936	ST03	1606WHW	OK	response	1
STtoU	1937	ST05	1611TKC	OK	response	1
STtoU	1938	ST03	1606WHW	你,食,飯	statement	3
STtoU	1939	ST04	1605HCN	你,食,甚麼	question	3
STtoU	1940	ST03	1606WHW	拜拜	convention	1
UtoST	1941	1605HCN	ST04	火腿	response	1
UtoST	1942	1606WHW	ST03	拜拜	convention	1
UtoST	1943	1611TKC	ST05	旅行	statement	1
STtoU	1944	ST04	1605HCN	我,拜拜	convention	2
STtoU	1945	ST04	1605HCN	我,拜拜	?	2
STtoU	1946	ST04	1605HCN	你,拜拜,嗎	question	3
STtoU	1947	ST05	1611TKC	去,旅行	statement	2
STtoU	1948	ST04	1605HCN	你,我,拜拜,OK,嗎	question	5
UtoST	1949	1605HCN	ST04	OK,多謝,哥哥	response	3
STtoU	1950	ST04	1605HCN	多謝,拜拜	convention	2
STtoU	1951	ST05	1611TKC	拜拜	convention	1
STtoU	1952	ST06	1906HYN	你好	convention	1
STtoU	1953	ST06	1906HYN	你好	?	1
STtoU	1954	ST06	1906HYN	你好	?	1
UtoST	1955	1906HYN	ST06	爸爸,OK	statement	2
UtoST	1956	1906HYN	ST06	BB	?	1
STtoU	1957	ST06	1906HYN	你好	convention	1
STtoU	1958	ST06	1906HYN	言語治療師	statement	1
UtoST	1959	1906HYN	ST06	姐姐,姐姐	convention	1
STtoU	1960	ST06	1906HYN	我要,食,蘋果	statement	3
UtoST	1961	1906HYN	ST06	BB,你好,飲	statement	3
UtoST	1962	1906HYN	ST06	飲,食	statement	2
STtoU	1963	ST06	1906HYN	洗／抹面,梳頭	statement	2
UtoST	1964	1906HYN	ST06	坐,糖	statement	2
STtoU	1965	ST06	1906HYN	蝦條	statement	1
UtoST	1966	1906HYN	ST06	麵包,粥	statement	2
STtoU	1967	ST06	1906HYN	開心	statement	1
STtoU	1968	ST06	1906HYN	拜拜	convention	1
STtoU	1969	ST07	1902YL	你好	convention	1
STtoU	1970	ST07	1902YL	OK	statement	1
STtoU	1971	ST07	1902YL	多謝	convention	1
UtoST	1972	1902YL	ST07	多謝	convention	1
UtoST	1973	1902YL	ST07	多謝	?	1
STtoU	1974	ST07	1902YL	你好	convention	1
STtoU	1975	ST06	1906HYN	你好	convention	1
UtoST	1976	1906HYN	ST06	姐姐	convention	1
UtoST	1977	1902YL	ST07	你好	convention	1
STtoU	1978	ST06	1906HYN	妹妹	convention	1
UtoST	1979	1906HYN	ST06	媽媽,你好,媽媽,哥哥	statement	4
UtoST	1980	1902YL	ST07	橙,廁所,首飾	statement	3
STtoU	1981	ST06	1906HYN	舉手	convention	1
UtoST	1982	1902YL	ST07	巴士,燈	statement	2
STtoU	1983	ST07	1902YL	打招呼	convention	1
STtoU	1984	ST07	1902YL	開心	statement	1
UtoST	1985	1906HYN	ST06	多謝,OK	statement	2
STtoU	1986	ST07	1902YL	洗／抹面	statement	1
UtoST	1987	1906HYN	ST06	多謝,哥哥	convention	2
STtoU	1988	ST06	1906HYN	打招呼	convention	1
STtoU	1989	ST07	1902YL	OK	convention	1
STtoU	1990	ST07	1902YL	你好	convention	1
STtoU	1991	ST06	1906HYN	你好	convention	1
STtoU	1992	ST07	1902YL	你好	convention	1
UtoST	1993	1902YL	ST07	你好	convention	1
STtoU	1994	ST07	1902YL	談話,開心,嗎	question	3
UtoST	1995	1902YL	ST07	OK	response	1
STtoU	1996	ST07	1902YL	上午,食,甚麼	question	3
UtoST	1997	1902YL	ST07	拜拜,拜拜	convention	2
STtoU	1998	ST06	1906HYN	你好	convention	1
UtoST	1999	1906HYN	ST06	你好,你好,你好	convention	1
STtoU	2000	ST06	1906HYN	你,靚	statement	2
UtoST	2001	1906HYN	ST06	多謝	convention	1
STtoU	2002	ST06	1906HYN	上午,食,甚麼	question	3
UtoST	2003	1906HYN	ST06	糖	response	1
STtoU	2004	ST06	1906HYN	OK	response	1
STtoU	2005	ST06	1906HYN	拜拜	convention	1
UtoST	2006	1906HYN	ST06	拜拜	convention	1
STtoU	2014	ST06	1902YL	你好	convention	1
UtoST	2015	1902YL	ST06	多謝	convention	1
STtoU	2025	ST07	1902YL	你好	convention	1
UtoST	2026	1902YL	ST07	幫忙,佢地	statement	2
UtoST	2027	1902YL	ST07	老師	statement	1
UtoST	2028	1902YL	ST07	售貨員	statement	1
STtoU	2029	ST07	1902YL	不開心	statement	1
STtoU	2030	ST06	1906HYN	你好	convention	1
UtoST	2031	1902YL	ST07	校車,聖誕慶祝會,排隊等車	statement	3
STtoU	2032	ST06	1906HYN	紫菜	statement	1
STtoU	2033	ST07	1902YL	洗／抹面	statement	1
UtoST	2034	1902YL	ST07	塗	statement	1
UtoST	2035	1906HYN	ST06	媽媽,坐,巴士,波,車,餅乾	statement	6
UtoST	2036	1902YL	ST07	4,左	?	2
UtoST	2037	1906HYN	ST06	糖,你好	statement	2
UtoST	2038	1902YL	ST07	聖誕咭	statement	1
UtoST	2039	1902YL	ST07	聖誕咭,電腦	statement	2
UtoST	2040	1902YL	ST07	電腦,門	statement	2
STtoU	2041	ST06	1906HYN	你好	convention	1
UtoST	2042	1902YL	ST07	新年	statement	1
UtoST	2043	1906HYN	ST06	你好	convention	1
UtoST	2044	1902YL	ST07	聖誕老人	statement	1
UtoST	2045	1902YL	ST07	聖誕花,輕鐵	statement	2
STtoU	2046	ST06	1906HYN	你,鍾意,甚麼	question	3
UtoST	2047	1902YL	ST07	私家車,小巴	statement	2
UtoST	2048	1902YL	ST07	波鞋	statement	1
UtoST	2049	1902YL	ST07	校服	statement	1
UtoST	2050	1906HYN	ST06	牛奶	response	1
STtoU	2051	ST06	1906HYN	你,鍾意,食	question	3
UtoST	2052	1902YL	ST07	醫院	statement	1
UtoST	2053	1902YL	ST07	傷殘人士廁所	statement	1
UtoST	2054	1902YL	ST07	商場	statement	1
STtoU	2055	ST07	1902YL	剪腳甲,洗／抹面	statement	2
UtoST	2056	1906HYN	ST06	魚	response	1
UtoST	2057	1902YL	ST07	穿鞋	statement	1
STtoU	2058	ST06	1906HYN	你,要,魚,嗎	question	4
UtoST	2059	1902YL	ST07	睡覺	statement	1
UtoST	2060	1902YL	ST07	看書,玩電腦	statement	2
UtoST	2061	1902YL	ST07	看書,入	statement	2
UtoST	2062	1906HYN	ST06	拜拜	convention	1
STtoU	2063	ST06	1906HYN	拜拜	convention	1
UtoST	2064	1902YL	ST07	唔知道,一起玩耍,你	statement	3
UtoST	2065	1902YL	ST07	幫忙,返回座位	statement	2
UtoST	2066	1902YL	ST07	坐好,家長日	statement	2
UtoST	2067	1902YL	ST07	下載,行	statement	2
STtoU	2068	ST07	1905LYY	你好	convention	1
UtoST	2069	1905LYY	ST07	你好	convention	1
UtoST	2070	1905LYY	ST07	戴安全帶	statement	1
UtoST	2071	1905LYY	ST07	碟	statement	1
STtoU	2072	ST07	1905LYY	拜拜	convention	1
STtoU	2073	ST07	1905LYY	你好	convention	1
UtoST	2074	1905LYY	ST07	打招呼	convention	1
STtoU	2075	ST07	1905LYY	食,甚麼	question	2
UtoST	2076	1905LYY	ST07	雪條	response	1
STtoU	2077	ST07	1905LYY	好食,嗎	question	2
UtoST	2078	1905LYY	ST07	好食	response	1
STtoU	2079	ST07	1905LYY	凍,嗎	question	2
UtoST	2080	1905LYY	ST07	熱	response	1
UtoST	2081	1905LYY	ST07	誰,公園	question	2
STtoU	2082	ST07	1905LYY	你,有,無,妹妹	question	4
UtoST	2083	1905LYY	ST07	有	response	1
STtoU	2084	ST07	1905LYY	有,多,少	question	3
STtoU	2085	ST07	1905LYY	有,多,少,妹妹	question	4
UtoST	2086	1905LYY	ST07	1	response	1
STtoU	2087	ST07	1905LYY	拜拜	convention	1
STtoU	2088	ST07	1905LYY	你好	convention	1
UtoST	2089	1905LYY	ST07	打招呼	convention	1
STtoU	2090	ST07	1905LYY	你,上午,食,甚麼	question	4
UtoST	2091	1905LYY	ST07	麵包	response	1
STtoU	2092	ST07	1905LYY	你,鍾意,食,麵包,嗎	question	5
STtoU	2093	ST06	1903CHY	你好	convention	1
UtoST	2094	1905LYY	ST07	鍾意	response	1
STtoU	2095	ST06	1903CHY	你好	convention	1
UtoST	2096	1903CHY	ST06	你好	convention	1
STtoU	2097	ST06	1903CHY	食,甚麼	question	2
UtoST	2098	1905LYY	ST07	你,鍾意,食,甚麼	question	4
STtoU	2099	ST06	1903CHY	剛才,飲,甚麼	question	3
STtoU	2100	ST07	1905LYY	我,鍾意,食,百力滋	response	4
UtoST	2101	1903CHY	ST06	飲,牛奶	response	2
STtoU	2102	ST06	1903CHY	有,無,去,洗手間	question	4
UtoST	2103	1905LYY	ST07	我,鍾意,食,三文治	statement	4
UtoST	2104	1903CHY	ST06	OK	response	1
STtoU	2105	ST06	1903CHY	拜拜	convention	1
STtoU	2106	ST07	1905LYY	你,而家,開心,嗎	question	4
UtoST	2107	1903CHY	ST06	拜拜	convention	1
UtoST	2108	1905LYY	ST07	開心	response	1
STtoU	2109	ST07	1905LYY	我,知道,你,開心	response	4
STtoU	2110	ST06	1903CHY	你好	convention	1
UtoST	2111	1905LYY	ST07	你,有,無,水	question	4
STtoU	2112	ST07	1905LYY		response	3
UtoST	2113	1903CHY	ST06	你好	convention	1
STtoU	2114	ST06	1903CHY	開心,嗎	question	2
STtoU	2115	ST07	1905LYY	你好	convention	1
STtoU	2116	ST07	1905LYY	我地,一起玩耍	question	2
UtoST	2117	1905LYY	ST07	OK	response	1
UtoST	2118	1903CHY	ST06	靚	statement	1
STtoU	2119	ST06	1903CHY	多謝	response	1
STtoU	2120	ST07	1905LYY	你,鍾意,玩電腦,嗎	question	4
STtoU	2121	ST06	1903CHY	你,靚	statement	2
UtoST	2122	1905LYY	ST07	鍾意	response	1
STtoU	2123	ST06	1903CHY	坐,甚麼,上學	question	3
STtoU	2124	ST07	1905LYY	你,中午,食,甚麼	question	4
UtoST	2125	1903CHY	ST06	校車	response	1
UtoST	2126	1905LYY	ST07	麵	response	1
STtoU	2127	ST06	1903CHY	做得好	response	1
STtoU	2128	ST06	1903CHY	鍾意,上學,嗎	question	3
UtoST	2130	1903CHY	ST06	點頭	response	1
STtoU	2131	ST06	1903CHY	開心,嗎	question	2
STtoU	2134	ST06	1903CHY	拜拜	convention	1
STtoU	2135	ST06	1903CHY	拜拜	convention	1
STtoU	2137	ST06	1903CHY	你好	convention	1
STtoU	2139	ST06	1903CHY	你好	convention	1
UtoST	2140	1903CHY	ST06	你好	convention	1
UtoST	2143	1903CHY	ST06	上課	statement	1
STtoU	2145	ST06	1903CHY	你,鍾意,食,甚麼	question	4
UtoST	2148	1903CHY	ST06	百力滋,蛋撻	response	2
STtoU	2149	ST06	1903CHY	要,百力滋,嗎	question	3
UtoST	2152	1903CHY	ST06	OK	response	1
STtoU	2153	ST06	1903CHY	拜拜	convention	1
STtoU	2174	ST06	1905LYY	你好	convention	1
UtoST	2175	1905LYY	ST06	幫忙	statement	1
UtoST	2176	1905LYY	ST06	你好,你好	convention	2
STtoU	2177	ST06	1905LYY	你,食飯,食,甚麼	question	4
UtoST	2178	1905LYY	ST06	抽筋	statement	1
UtoST	2179	1905LYY	ST06	我,食,麵,肉,菜	response	5
UtoST	2180	1905LYY	ST06	你,嗎	question	2
STtoU	2181	ST06	1905LYY	我,食,意大利粉,菜,橙	response	5
UtoST	2182	1905LYY	ST06	拜拜	convention	1
STtoU	2183	ST06	1903CHY	你好	convention	1
UtoST	2184	1903CHY	ST06	你好	convention	1
STtoU	2185	ST06	1903CHY	拜拜	convention	1
UtoST	2186	1903CHY	ST06	拜拜	convention	1
STtoU	2187	ST06	1903CHY	你好	convention	1
UtoST	2188	1903CHY	ST06	你好	convention	1
STtoU	2189	ST06	1903CHY	你,開心,嗎	question	3
STtoU	2190	ST06	1903CHY	你,開心,嗎	question	3
UtoST	2191	1903CHY	ST06	開心	response	1
STtoU	2192	ST06	1903CHY	你,鍾意,食,甚麼	question	4
UtoST	2193	1903CHY	ST06	薯條	response	1
STtoU	2194	ST06	1903CHY	我,鍾意,漢堡包	statement	3
STtoU	2195	ST06	1903CHY	拜拜	convention	1
UtoST	2196	1903CHY	ST06	拜拜	convention	1
UtoST	2197	1903CHY	ST06	你好	convention	1
STtoU	2198	ST06	1904MKL	你好	convention	1
UtoST	2199	1904MKL	ST06	多謝	convention	1
UtoST	2200	1904MKL	ST06	你好	convention	1
STtoU	2201	ST06	1904MKL	燒烤,開心,嗎	question	3
UtoST	2202	1904MKL	ST06	開心	response	1
STtoU	2203	ST06	1904MKL	好食,嗎	question	2
UtoST	2204	1904MKL	ST06	好食	response	1
STtoU	2205	ST06	1904MKL	你,流鼻水,嗎	question	3
UtoST	2206	1904MKL	ST06	有	response	1
STtoU	2207	ST06	1904MKL	有,看醫生,嗎	question	3
UtoST	2208	1904MKL	ST06	無	response	1
STtoU	2209	ST06	1904MKL	食藥,嗎	question	2
UtoST	2210	1904MKL	ST06	有	response	1
UtoST	2212	1904MKL	ST06	無	response	1
UtoST	2214	1904MKL	ST06	無	?	1
UtoST	2216	1917LTC	ST02	你好	convention	1
STtoU	2217	ST02	1917LTC	你好,你,昨天,夜晚,食,甚麼	question	6
UtoST	2218	1917LTC	ST02	我,食,瓜,肉	response	4
STtoU	2219	ST02	1917LTC	好食,嗎	question	2
UtoST	2220	1917LTC	ST02	OK	response	1
STtoU	2221	ST02	1917LTC	端午節,你,去,哪裡	question	4
UtoST	2222	1917LTC	ST02	唔知道	response	1
STtoU	2223	ST02	1917LTC	明天,我,鍾意,聽歌	statement	4
UtoST	2224	1917LTC	ST02	昨天,食,蛋糕	statement	3
STtoU	2225	ST02	1917LTC	為甚麼,生日會,嗎	question	3
UtoST	2226	1917LTC	ST02	媽媽,生日會	response	2
STtoU	2227	ST02	1917LTC	你,媽媽,生日會,開心	statement	4
STtoU	2228	ST02	1917LTC	拜拜	convention	1
UtoST	2276	1903CHY	ST06	你好	convention	1
STtoU	2277	ST06	1903CHY	你好	convention	1
STtoU	2278	ST06	1903CHY	你,開心,嗎	question	3
UtoST	2279	1903CHY	ST06	開心	response	1
STtoU	2280	ST06	1903CHY	拜拜	convention	1
UtoST	2281	1903CHY	ST06	拜拜	convention	1
STtoU	2282	ST06	1905LYY	你好	convention	1
UtoST	2283	1905LYY	ST06	你好	convention	1
STtoU	2284	ST06	1905LYY	你,痛,嗎	question	3
UtoST	2285	1905LYY	ST06	我,無,痛	response	3
STtoU	2286	ST06	1905LYY	洗澡,OK,嗎	question	3
UtoST	2287	1905LYY	ST06	OK	response	1
STtoU	2288	ST06	1905LYY	看醫生,嗎	question	2
UtoST	2289	1905LYY	ST06	有	response	1
STtoU	2290	ST06	1905LYY	做得好	response	1
STtoU	2291	ST06	1905LYY	你,食,甚麼	question	3
UtoST	2292	1905LYY	ST06	我,食,叉燒,雞蛋,菜,飯	response	6
STtoU	2293	ST06	1905LYY	好食,嗎	question	2
UtoST	2294	1905LYY	ST06	好食	response	1
STtoU	2295	ST06	1905LYY	拜拜	convention	1
UtoST	2296	1905LYY	ST06	拜拜	convention	1
STtoU	2304	ST06	1904MKL	你好	convention	1
UtoST	2305	1904MKL	ST06	你好	convention	1
UtoST	2306	1904MKL	ST06	校車	statement	1
STtoU	2307	ST06	1904MKL	是	response	1
UtoST	2308	1904MKL	ST06	鍾意	question	1
STtoU	2309	ST06	1904MKL	豬	response	1
STtoU	2310	ST06	1904MKL	薯仔	response	1
UtoST	2311	1904MKL	ST06	聽歌	statement	1
STtoU	2312	ST06	1904MKL	鍾意	question	1
UtoST	2313	1904MKL	ST06	唔知道	response	1
UtoST	2314	1904MKL	ST06	洗澡	question	1
STtoU	2315	ST06	1904MKL	有	response	1
STtoU	2316	ST06	1904MKL	長褲	question	1
UtoST	2317	1904MKL	ST06	有	response	1
UtoST	2318	1904MKL	ST06	薯片,鍾意,嗎	question	3
STtoU	2319	ST06	1904MKL	鍾意	response	1
STtoU	2320	ST06	1904MKL	蝦片,鍾意,嗎	question	3
UtoST	2321	1904MKL	ST06	唔鍾意	response	1
UtoST	2322	1904MKL	ST06	紫菜,鍾意,嗎	question	3
STtoU	2323	ST06	1904MKL	鍾意	response	1
UtoST	2324	1904MKL	ST06	聖誕老人	statement	1
STtoU	2325	ST06	1904MKL	開心	statement	1
STtoU	2326	ST06	1904MKL	揮春	question	1
UtoST	2327	1904MKL	ST06	有	response	1
STtoU	2328	ST06	1904MKL	有	statement	1
UtoST	2329	1904MKL	ST06	八達通咭	question	1
STtoU	2330	ST06	1904MKL	有	response	1
UtoST	2331	1904MKL	ST06	簿	question	1
STtoU	2332	ST06	1904MKL	有	response	1
STtoU	2333	ST06	1904MKL	鍾意	question	1
UtoST	2334	1904MKL	ST06	藥房	response	1
STtoU	2335	ST06	1904MKL	我	statement	1
UtoST	2336	1904MKL	ST06	唔鍾意	statement	1
UtoST	2337	1904MKL	ST06	污糟	statement	1
UtoST	2338	1904MKL	ST06	洗髮	statement	1
STtoU	2339	ST06	1904MKL	OK	response	1
UtoST	2340	1904MKL	ST06	拜拜	convention	1
STtoU	2365	ST08	1913CHY	你好	convention	1
STtoU	2366	ST08	1913CHY	你好	convention	1
UtoST	2367	1913CHY	ST08	你好	convention	1
STtoU	2368	ST08	1913CHY	你,鍾意,飲,甚麼	question	4
UtoST	2369	1913CHY	ST08	鍾意,飲,茶	response	3
STtoU	2370	ST08	1913CHY	鍾意,食,甚麼	question	3
STtoU	2371	ST08	1913CHY	你好	convention	1
UtoST	2372	1913CHY	ST08	你好	convention	1
STtoU	2373	ST08	1913CHY	你,剛才,食,甚麼	question	4
UtoST	2375	1913CHY	ST08	食,麵	response	2
STtoU	2376	ST08	1913CHY	你,飲,甚麼	question	3
UtoST	2380	1913CHY	ST08	我,飲,茶	response	3
STtoU	2383	ST08	1913CHY	拜拜	convention	1
UtoST	2384	1913CHY	ST08	拜拜	convention	1
STtoU	2385	ST08	1617TLC	你好	convention	1
UtoST	2386	1617TLC	ST08	你好	convention	1
STtoU	2387	ST08	1617TLC	你,上午,食,甚麼	question	4
UtoST	2388	1617TLC	ST08	我,食,三文治	response	3
STtoU	2389	ST08	1617TLC	你,鍾意,飲,甚麼	question	4
UtoST	2390	1617TLC	ST08	我,鍾意,飲,汽水	response	4
STtoU	2391	ST08	1617TLC	拜拜	convention	1
UtoST	2392	1617TLC	ST08	拜拜	convention	1
STtoU	2393	ST08	1617TLC	你好	convention	1
UtoST	2394	1617TLC	ST08	我,OK	statement	2
STtoU	2395	ST08	1617TLC	你,何時,上班	question	3
UtoST	2396	1617TLC	ST08	我,上午,上班	response	3
STtoU	2397	ST08	1617TLC	端午節,食,甚麼	question	3
UtoST	2400	1617TLC	ST08	端午節,食,粽	response	3
UtoST	2401	1617TLC	ST08	我	statement	1
UtoST	2405	1617TLC	ST08	我,唔鍾意,食,粽	statement	4
STtoU	2407	ST08	1617TLC	你,鍾意,畫畫,嗎	question	4
UtoST	2409	1617TLC	ST08	我,鍾意,畫畫	response	3
UtoST	2412	1617TLC	ST08	晚禮服,我,畫畫	statement	3
STtoU	2413	ST08	1617TLC	晚禮服,你,何時,畫畫	question	4
UtoST	2414	1617TLC	ST08	1,6	response	2
UtoST	2415	1617TLC	ST08	拜拜	convention	1
STtoU	2416	ST08	1617TLC	拜拜	convention	1
STtoU	2417	ST08	1912LWY	你好	convention	1
STtoU	2418	ST08	1912LWY	你好	convention	1
UtoST	2419	1912LWY	ST08	OK	statement	1
STtoU	2420	ST08	1912LWY	上午,食,甚麼	question	3
UtoST	2421	1912LWY	ST08	麵	response	1
STtoU	2422	ST08	1912LWY	一陣,食,甚麼	question	3
UtoST	2423	1912LWY	ST08	啫喱,月餅	response	2
STtoU	2424	ST08	1912LWY	鍾意,飲,甚麼	question	3
UtoST	2425	1912LWY	ST08	可樂	response	1
STtoU	2426	ST08	1909SML	你好	convention	1
UtoST	2428	1909SML	ST08	打招呼	convention	1
STtoU	2430	ST08	1909SML	上午,食,甚麼	question	3
STtoU	2431	ST08	1909SML	你,鍾意,食,甚麼	question	4
UtoST	2433	1909SML	ST08	OK	statement	1
UtoST	2434	1909SML	ST08	腸粉	response	1
STtoU	2435	ST08	1909SML	你,鍾意,飲,甚麼	question	4
UtoST	2439	1909SML	ST08	拜拜	convention	1
STtoU	2444	ST06	1902YL	你好	convention	1
UtoST	2445	1902YL	ST06	你好	convention	1
STtoU	2446	ST06	1902YL	聽歌,嗎	question	2
UtoST	2447	1902YL	ST06	OK	response	1
STtoU	2448	ST06	1902YL	開心,嗎	question	2
UtoST	2449	1902YL	ST06	OK	response	1
UtoST	2450	1902YL	ST06	嗎	?	1
UtoST	2451	1902YL	ST06	嗎	?	1
STtoU	2452	ST06	1902YL	鍾意,薯條,嗎	question	3
UtoST	2453	1902YL	ST06	熨斗	statement	1
UtoST	2454	1902YL	ST06	你好,OK	convention	2
UtoST	2455	1902YL	ST06	發燒,嘔	statement	2
UtoST	2456	1902YL	ST06	污糟	statement	1
UtoST	2457	1902YL	ST06	嗎	?	1
UtoST	2458	1902YL	ST06	鉛筆	statement	1
STtoU	2459	ST06	1902YL	昨天,發燒	statement	2
UtoST	2460	1902YL	ST06	媽媽,老師	statement	2
UtoST	2461	1902YL	ST06	BB	statement	1
UtoST	2462	1902YL	ST06	拜拜	convention	1
STtoU	2463	ST06	1902YL	拜拜	convention	1
STtoU	2473	ST06	1906HYN	你好	convention	1
UtoST	2474	1906HYN	ST06	你好	convention	1
STtoU	2475	ST06	1906HYN	你好	convention	1
UtoST	2476	1906HYN	ST06	你好	convention	1
STtoU	2477	ST06	1906HYN	你好	convention	1
UtoST	2478	1906HYN	ST06	你好	convention	1
STtoU	2479	ST06	1906HYN	聽歌	question	1
STtoU	2480	ST06	1906HYN	聽歌,嗎	question	2
UtoST	2481	1906HYN	ST06	OK	response	1
UtoST	2482	1906HYN	ST06	拜拜	convention	1
STtoU	2483	ST06	1906HYN	你好	convention	1
UtoST	2484	1906HYN	ST06	你好	convention	1
STtoU	2485	ST06	1906HYN	聽歌,嗎	question	2
UtoST	2486	1906HYN	ST06	OK	response	1
STtoU	2487	ST06	1906HYN	拜拜	convention	1
UtoST	2488	1906HYN	ST06	拜拜	convention	1
UtoST	2489	1906HYN	ST06	花	statement	1
STtoU	2490	ST06	1906HYN	芝士	statement	1
STtoU	2491	ST06	1906HYN	開心	statement	1
UtoST	2492	1906HYN	ST06	牛奶	statement	1
STtoU	2493	ST06	1906HYN	你好	convention	1
UtoST	2494	1906HYN	ST06	OK	response	1
STtoU	2495	ST06	1906HYN	你好	convention	1
UtoST	2496	1906HYN	ST06	爸爸,哥哥	statement	2
STtoU	2497	ST06	1906HYN	你好	convention	1
UtoST	2498	1906HYN	ST06	你好	convention	1
UtoST	2499	1906HYN	ST06	紙	statement	1
STtoU	2500	ST06	1906HYN	你好	convention	1
UtoST	2501	1906HYN	ST06	粥	statement	1
STtoU	2502	ST06	1906HYN	拜拜	convention	1
UtoST	2503	1906HYN	ST06	拜拜	convention	1
UtoST	2517	1603TWK	ST09	你好	convention	1
UtoST	2518	1603TWK	ST09	雪糕	statement	1
UtoST	2519	1603TWK	ST09	去	statement	1
STtoU	2520	ST09	1603TWK	你好	convention	1
UtoST	2521	1603TWK	ST09	你好	convention	1
STtoU	2522	ST09	1603TWK	OK	statement	1
UtoST	2523	1603TWK	ST09	OK	statement	1
STtoU	2524	ST09	1603TWK	食,甚麼	question	2
UtoST	2525	1603TWK	ST09	水	response	1
STtoU	2526	ST09	1603TWK	我,食,麵包	statement	3
STtoU	2527	ST09	1603TWK	拜拜	convention	1
STtoU	2528	ST09	1603TWK	你好	convention	1
UtoST	2529	1603TWK	ST09	你好	convention	1
UtoST	2530	1603TWK	ST09	難食	statement	1
STtoU	2531	ST09	1603TWK	食,甚麼	question	2
UtoST	2532	1603TWK	ST09	菜,水	response	2
UtoST	2533	1603TWK	ST09	OK,多謝,哥哥	statement	3
STtoU	2534	ST09	1603TWK	多謝	convention	1
STtoU	2535	ST09	1603TWK	去,哪裡	question	2
UtoST	2536	1603TWK	ST09	餐廳	response	1
STtoU	2537	ST09	1603TWK	拜拜	convention	1
STtoU	2538	ST09	1901TTT	你好	convention	1
UtoST	2539	1901TTT	ST09	你好	convention	1
STtoU	2540	ST09	1901TTT	食,甚麼	question	2
STtoU	2541	ST09	1901TTT	拜拜	convention	1
STtoU	2542	ST09	1602IKK	你好	convention	1
STtoU	2543	ST09	1602IKK	你好	convention	1
UtoST	2544	1602IKK	ST09	你好	convention	1
UtoST	2545	1602IKK	ST09	美食廣場	statement	1
STtoU	2546	ST09	1602IKK	去,哪裡	question	2
UtoST	2547	1602IKK	ST09	雪糕,士多啤梨,蛋撻	response	3
STtoU	2548	ST09	1602IKK	食,麵包	question	2
UtoST	2549	1602IKK	ST09	食,腸粉,牛肉	response	3
STtoU	2550	ST09	1602IKK	拜拜	convention	1
STtoU	2619	ST02	1914KSY	你好	convention	1
UtoST	2620	1914KSY	ST02	你好	convention	1
STtoU	2621	ST02	1914KSY	你,剛才,食,甚麼	question	4
UtoST	2622	1914KSY	ST02	我,食,菜,蘿蔔,薯仔	response	5
STtoU	2623	ST02	1914KSY	端午節,有,無,食,粽	question	5
UtoST	2624	1914KSY	ST02	無	response	1
UtoST	2628	1914KSY	ST02	你,端午節,有,無,食,粽	question	6
STtoU	2629	ST02	1914KSY	我,有,食,粽,好食	response	5
UtoST	2631	1914KSY	ST02	我,一起玩耍,打乒乓球	statement	3
STtoU	2633	ST02	1914KSY	我地,嗎	question	2
UtoST	2637	1914KSY	ST02	我地	response	1
STtoU	2638	ST02	1914KSY	何時	question	1
STtoU	2643	ST02	1914KSY	7,熱	response	2
UtoST	2644	1914KSY	ST02	OK	response	1
STtoU	2645	ST02	1914KSY	OK	response	1
STtoU	2646	ST02	1914KSY	拜拜	convention	1
UtoST	2647	1914KSY	ST02	拜拜	convention	1
STtoU	2652	ST02	1916SKM	你好	convention	1
STtoU	2653	ST02	1916SKM	你好	convention	1
STtoU	2654	ST02	1916SKM	你,上午,食,甚麼	question	4
UtoST	2655	1916SKM	ST02	我,食,叉燒,麵	response	4
STtoU	2656	ST02	1916SKM	你,夜晚,何時,食飯	question	4
UtoST	2657	1916SKM	ST02	8	response	1
STtoU	2658	ST02	1916SKM	一陣,誰,老師,上課	question	4
STtoU	2659	ST02	1916SKM	你,鍾意,去,哪裡	question	4
UtoST	2660	1916SKM	ST02	天壇大佛	response	1
STtoU	2661	ST02	1916SKM	坐,甚麼,巴士,去	question	4
UtoST	2662	1916SKM	ST02	巴士,山頂纜車	response	2
STtoU	2663	ST02	1916SKM	OK,拜拜	response	2
UtoST	2664	1916SKM	ST02	拜拜	convention	1
UtoST	2665	1909SML	ST08	你好	convention	1
UtoST	2666	1909SML	ST08	你好	convention	1
STtoU	2667	ST08	1909SML	你好	convention	1
STtoU	2668	ST08	1909SML	你,鍾意,食,甚麼	question	4
UtoST	2669	1909SML	ST08	我,鍾意,食,燒賣,意大利粉	response	5
STtoU	2670	ST08	1909SML	你,鍾意,飲,甚麼	question	4
UtoST	2671	1909SML	ST08	我,鍾意,飲,檸檬茶	response	4
STtoU	2672	ST08	1909SML	何時,上班	question	2
UtoST	2673	1909SML	ST08	上午,10,上班	response	3
STtoU	2674	ST08	1909SML	你,怎樣,上班	question	3
UtoST	2675	1909SML	ST08	我,坐,巴士,上班	response	4
STtoU	2676	ST08	1909SML	一陣,去,哪裡	question	3
UtoST	2677	1909SML	ST08	我,一陣,去,醫院	response	4
UtoST	2678	1909SML	ST08	拜拜	convention	1
STtoU	2679	ST08	1909SML	拜拜	convention	1
STtoU	2701	ST02	1914KSY	你好	convention	1
UtoST	2702	1914KSY	ST02	你好	convention	1
UtoST	2703	1914KSY	ST02	一陣,上課,做甚麼	question	3
STtoU	2704	ST02	1914KSY	玩電腦	response	1
UtoST	2705	1914KSY	ST02	誰,玩電腦	question	2
STtoU	2706	ST02	1914KSY	老師,同學	response	2
STtoU	2722	ST06	1902YL	你好	convention	1
UtoST	2723	1902YL	ST06	你好	convention	1
UtoST	2724	1902YL	ST06	藥房	statement	1
STtoU	2725	ST06	1902YL	哪裡	question	1
UtoST	2726	1902YL	ST06	我	statement	1
UtoST	2727	1902YL	ST06	我	statement	1
STtoU	2728	ST06	1902YL	你,怎樣	question	2
UtoST	2729	1902YL	ST06	我,校長,我,職業治療師,車,電飯煲	statement	6
STtoU	2730	ST06	1902YL	是	response	1
UtoST	2731	1902YL	ST06	電飯煲,復活節,兒童節	statement	3
STtoU	2732	ST06	1902YL	拜拜	convention	1
STtoU	2733	ST06	1902YL	你好	convention	1
UtoST	2734	1902YL	ST06	幫忙,發燒,抽筋,中秋節,我,兒童節	statement	6
UtoST	2735	1902YL	ST06	我	statement	1
UtoST	2736	1902YL	ST06	我	statement	1
STtoU	2737	ST06	1902YL	唔知道	response	1
UtoST	2738	1902YL	ST06	BB,你,廁所,我,你	statement	5
STtoU	2739	ST06	1902YL	你,去,洗手間,嗎	question	4
UtoST	2740	1902YL	ST06	梳化,發燒	statement	2
STtoU	2741	ST06	1902YL	唔知道	response	1
UtoST	2742	1902YL	ST06	OK	response	1
UtoST	2743	1902YL	ST06	拜拜	convention	1
STtoU	2744	ST06	1902YL	拜拜	convention	1
STtoU	2745	ST06	1902YL	你好	convention	1
UtoST	2746	1902YL	ST06	你好	convention	1
STtoU	2747	ST06	1902YL	我,OK	statement	2
STtoU	2748	ST06	1902YL	多謝	convention	1
UtoST	2749	1902YL	ST06	你好,一起玩耍	question	2
STtoU	2750	ST06	1902YL	OK	response	1
UtoST	2751	1902YL	ST06	拜拜	convention	1
STtoU	2752	ST06	1902YL	拜拜	convention	1
STtoU	2753	ST06	1902YL	你好	convention	1
UtoST	2754	1902YL	ST06	你好	convention	1
STtoU	2755	ST06	1902YL	巴士,鍾意,嗎	question	3
UtoST	2756	1902YL	ST06	唔鍾意	response	1
STtoU	2757	ST06	1902YL	飛機,鍾意,嗎	question	3
UtoST	2758	1902YL	ST06	唔鍾意	response	1
STtoU	2759	ST06	1902YL	OK	response	1
STtoU	2760	ST06	1902YL	拜拜	convention	1
UtoST	2761	1902YL	ST06	拜拜	convention	1

## Sheet: conversation
Type	trial_order	username	toUserName	chatContent	convo_ID	num_msg	num_turns	pair_ID	single_participant
UU	115	1609LSM	1601HKW	開心	1	1	1	2
UU	116	1601HKW	1609LSM	棉花糖	1	2	2	2
UU	169	1609LSM	1610CLY	同學,食,朱古力	2	1	1	3
UU	170	1610CLY	1609LSM		2	2	2	3
UU	171	1610CLY	1609LSM	我,汽水	2	3	2	3
UU	172	1609LSM	1610CLY	打招呼	2	4	3	3
UU	173	1610CLY	1609LSM	打招呼	2	5	4	3
UU	174	1609LSM	1610CLY	我,拜拜	2	6	5	3
UU	175	1611TKC	1609LSM	放鬆	3	1	1	#N/A	1
UU	176	1611TKC	1609LSM	幫忙,碟	3	2	1	#N/A	1
UU	225	1612HHP	1614TS	我,食,麵包,燒賣,,	4	1	1	7
UU	226	1614TS	1612HHP	你,食,甚麼,,,	4	2	2	7
UU	227	1614TS	1612HHP	你,飲,甚麼,,,	4	3	2	7
UU	228	1614TS	1612HHP	開心,,,,,	4	4	2	7
UU	229	1612HHP	1614TS	我,食,飯,,,	4	5	3	7
UU	230	1614TS	1612HHP	你,,,,,	4	6	4	7
UU	231	1615LTS	1616LCF	你,,,,,	5	1	1	13
UU	232	1616LCF	1615LTS	我,食,麵包,,,	5	2	2	13
UU	233	1615LTS	1614TS	你,坐,飯,,,	6	1	1	11
UU	234	1614TS	1615LTS	我,飲,茶,,,	6	2	2	11
UU	235	1615LTS	1614TS	你,飲,甚麼,,,	6	3	3	11
UU	236	1614TS	1615LTS	我,食,麵包,燒賣,,	6	4	4	11
UU	237	1615LTS	1614TS	你,飲,甚麼,,,	6	5	5	11
UU	238	1614TS	1615LTS	我,飲,水,牛奶,茶,	6	6	6	11
UU	239	1615LTS	1614TS	我,飲,水,茶,牛奶,	6	7	7	11
UU	240	1615LTS	1614TS	我,食,麵包,燒賣,,	6	8	7	11
UU	241	1614TS	1615LTS	你,飲,食,甚麼,,	6	9	8	11
UU	242	1615LTS	1614TS	,,,,,	6	10	9	11
UU	243	1615LTS	1614TS	馬,憤怒,生病,碗,害怕,	6	11	9	11
UU	244	1614TS	1615LTS	馬,水鞋,生病,嘔,,	6	12	10	11
UU	245	1617TLC	1613YWS	你,飲,食,甚麼,,	7	1	1	10
UU	246	1613YWS	1617TLC	你,飲,食,甚麼,,	7	2	2	10
UU	247	1613YWS	1617TLC	我,食,燒賣,麵包,,	7	3	2	10
UU	248	1617TLC	1613YWS	我,食,燒賣,麵包,,	7	4	3	10
UU	249	1617TLC	1613YWS	我,飲,水,茶,牛奶,	7	5	3	10
UU	250	1613YWS	1617TLC	我,飲,茶,水,牛奶,	7	6	4	10
UU	251	1616LCF	1614TS	你,飲,食,甚麼,,	8	1	1	12
UU	252	1614TS	1616LCF	你,企,飲,食,甚麼,	8	2	2	12
UU	253	1614TS	1616LCF	甚麼,,,,,	8	3	2	12
UU	254	1616LCF	1614TS	我,食,麵包,燒賣,,	8	4	3	12
UU	255	1614TS	1616LCF	我,食,燒賣,麵包,,	8	5	4	12
UU	256	1616LCF	1614TS	我,飲,茶,牛奶,水,	8	6	5	12
UU	257	1614TS	1616LCF	我,飲,牛奶,水,茶,	8	7	6	12
UU	258	1616LCF	1614TS	馬,裙,,,,	8	8	7	12
UU	259	1614TS	1616LCF	短褲,羊,,,,	8	9	8	12
UU	260	1613YWS	1614TS	我,,,,,	9	1	1	8
UU	261	1614TS	1613YWS	你,,,,,	9	2	2	8
UU	262	1614TS	1615LTS	我,你,,,,	10	1	1	#N/A	1
UU	263	1614TS	1615LTS	甚麼,,,,,	10	2	1	#N/A	1
UU	264	1614TS	1615LTS	我,,,,,	10	3	1	#N/A	1
UU	265	1614TS	1615LTS	甚麼,,,,,	10	4	1	#N/A	1
UU	330	1614TS	1612HHP	你,食,甚麼,,,	11	1	1	7
UU	331	1612HHP	1614TS	我,食,燒賣,,,	11	2	2	7
UU	332	1612HHP	1614TS	媽媽,,,,,	11	3	2	7
UU	333	1612HHP	1614TS	你,飲,碗,,,	11	4	2	7
UU	334	1613YWS	1616LCF	你,食,甚麼,,,	12	1	1	9
UU	335	1616LCF	1613YWS	我,食,麵包,,,	12	2	2	9
UU	336	1616LCF	1613YWS	,,,,,	12	3	2	9
UU	337	1616LCF	1613YWS	我,,,,,	12	4	2	9
UU	338	1616LCF	1613YWS	我,,,,,	12	5	2	9
UU	340	1616LCF	1613YWS	我,飲,水,,,	12	6	2	9
UU	344	1616LCF	1613YWS	牛奶,,,,,	12	7	2	9
UU	345	1616LCF	1617TLC	甚麼,,,,,	13	1	1	14
UU	346	1616LCF	1617TLC	甚麼,,,,,	13	2	1	14
UU	347	1616LCF	1617TLC	我,開心,,,,	13	3	1	14
UU	348	1616LCF	1617TLC	我,開心,,,,	13	4	1	14
UU	349	1617TLC	1616LCF	同學,,,,,	13	5	2	14
UU	350	1616LCF	1617TLC	我,開心,,,,	13	6	3	14
UU	351	1617TLC	1616LCF	同學,開心,,,,	13	7	4	14
UU	352	1616LCF	1617TLC	我,食,,,,	13	8	5	14
UU	353	1616LCF	1617TLC	甚麼,,,,,	13	9	5	14
UU	354	1617TLC	1616LCF	我,開心,,,,	13	10	6	14
UU	355	1616LCF	1617TLC	我,行,學校,,,	13	11	7	14
UU	356	1617TLC	1616LCF	甚麼,,,,,	13	12	8	14
UU	357	1616LCF	1617TLC	食,餅乾,,,,	13	13	9	14
UU	358	1617TLC	1616LCF	悶,,,,,	13	14	10	14
UU	359	1616LCF	1617TLC	牛,,,,,	13	15	11	14
UU	360	1616LCF	1617TLC	打招呼,,,,,	13	16	11	14
UU	361	1616LCF	1617TLC	牛,,,,,	13	17	11	14
UU	362	1616LCF	1617TLC	打招呼,,,,,	13	18	11	14
UU	363	1616LCF	1617TLC	一起玩耍,,,,,	13	19	11	14
UU	1032	1613YWS	1614TS	害怕	14	1	1	8
UU	1033	1614TS	1613YWS	不明白	14	2	2	8
UU	1035	1613YWS	1614TS	我,鍾意,朱古力	14	3	3	8
UU	1039	1613YWS	1614TS	你,鍾意,食,甚麼	14	4	3	8
UU	1041	1613YWS	1614TS	打招呼	15	1	1	8
UU	1042	1614TS	1613YWS	我,鍾意,蛋糕,或者,麵	15	2	2	8
UU	1044	1613YWS	1614TS	我,鍾意,食,麵包	15	3	3	8
UU	1046	1614TS	1613YWS	我地,約期,上街,食飯	15	4	4	8
UU	1047	1613YWS	1614TS	知道,拜拜	15	5	5	8
UU	1048	1614TS	1613YWS	拜拜	15	6	6	8
UU	1049	1614TS	1613YWS	打招呼	16	1	1	8
UU	1051	1613YWS	1614TS	打招呼	16	2	2	8
UU	1053	1614TS	1613YWS	你,鍾意,食	16	3	3	8
UU	1064	1613YWS	1614TS	打招呼	16	4	4	8
UU	1066	1614TS	1613YWS	打招呼	16	5	5	8
UU	1068	1613YWS	1614TS	你,鍾意,食,甚麼	16	6	6	8
UU	1071	1614TS	1613YWS	我,鍾意,腸粉	16	7	7	8
UU	1075	1613YWS	1614TS	我地,約期,食飯	16	8	8	8
UU	1076	1614TS	1613YWS	知道	16	9	9	8
UU	1077	1613YWS	1614TS	拜拜	16	10	10	8
UU	1080	1614TS	1613YWS	拜拜	16	11	11	8
UU	1081	1614TS	1613YWS	你,買,甚麼	17	1	1	8
UU	1082	1614TS	1613YWS	你,靚	17	2	1	8
UU	1084	1613YWS	1614TS	我,開心	17	3	2	8
UU	1085	1614TS	1613YWS	拜拜	17	4	3	8
UU	1086	1613YWS	1614TS	拜拜	17	5	4	8
UU	1088	1613YWS	1614TS	你,靚	18	1	1	8
UU	1091	1614TS	1613YWS	我,開心	18	2	2	8
UU	1093	1613YWS	1614TS	拜拜	18	3	3	8
UU	1095	1614TS	1613YWS	拜拜	18	4	4	8
UU	1099	1613YWS	1614TS	你,靚	19	1	1	8
UU	1102	1614TS	1613YWS	我,開心	19	2	2	8
UU	1104	1613YWS	1614TS	拜拜	19	3	3	8
UU	1106	1614TS	1613YWS	拜拜	19	4	4	8
UU	1116	1612HHP	1614TS	打招呼	20	1	1	7
UU	1118	1612HHP	1614TS	你,開心	20	2	1	7
UU	1121	1614TS	1612HHP	打招呼	20	3	2	7
UU	1124	1612HHP	1614TS	我,鍾意,食,飯	20	4	3	7
UU	1135	1614TS	1612HHP	我,腸粉	20	5	4	7
UU	1138	1612HHP	1614TS	我,拜拜	20	6	5	7
UU	1142	1614TS	1612HHP	我,知道	20	7	6	7
UU	1147	1613YWS	1614TS	我,鍾意,食,餅乾	21	1	1	8
UU	1155	1614TS	1613YWS	拜拜	21	2	2	8
UU	1447	1612HHP	1613YWS	你,買,甚麼	22	1	1	6
UU	1451	1613YWS	1612HHP	我,買,波鞋	22	2	2	6
UU	1463	1612HHP	1613YWS	你,鍾意,甚麼	22	3	3	6
UU	1464	1613YWS	1612HHP	我,去,酒樓	22	4	4	6
UU	1465	1613YWS	1612HHP	我,食,燒賣	22	5	4	6
UU	1484	1613YWS	1612HHP	你,買,甚麼	22	6	4	6
UU	1487	1612HHP	1613YWS	我,買,雞翼	22	7	5	6
UU	1490	1613YWS	1612HHP	我,食,麵包	22	8	6	6
UU	1491	1612HHP	1613YWS	我,悶	22	9	7	6
UU	1497	1612HHP	1613YWS	我,鍾意,食,狗	22	10	7	6
UU	1526	1612HHP	1613YWS	你,打招呼	22	11	7	6
UU	1527	1613YWS	1612HHP	我,開心	22	12	8	6
UU	1528	1613YWS	1612HHP	你,鍾意,誰	22	13	8	6
UU	1529	1612HHP	1613YWS	你	22	14	9	6
UU	1530	1613YWS	1612HHP	我,開心	22	15	10	6
UU	1531	1613YWS	1612HHP	你,去,哪裡,拍拖	22	16	10	6
UU	1532	1612HHP	1613YWS	餐廳	22	17	11	6
UU	1533	1613YWS	1612HHP	你,食,甚麼	22	18	12	6
UU	1534	1612HHP	1613YWS	芝士,意大利粉	22	19	13	6
UU	1535	1613YWS	1612HHP	OK	22	20	14	6
UU	1536	1613YWS	1612HHP	你,鍾意,飲,甚麼	22	21	14	6
UU	1537	1612HHP	1613YWS	益力多,好食	22	22	15	6
UU	1538	1613YWS	1612HHP	我,買,益力多	22	23	16	6
UU	1539	1612HHP	1613YWS	你,復活節,做甚麼	22	24	17	6
UU	1540	1612HHP	1613YWS	超級市場,入面,益力多	22	25	17	6
UU	1541	1613YWS	1612HHP	我,去,玩玩具	22	26	18	6
UU	1542	1613YWS	1612HHP	我地,約期,上街	22	27	18	6
UU	1543	1612HHP	1613YWS	我,OK,開心	22	28	19	6
UU	1544	1613YWS	1612HHP	拜拜	22	29	20	6
UU	1802	1914KSY	1917LTC	你好	23	1	1	20
UU	1803	1917LTC	1914KSY	上午,食,甚麼	23	2	2	20
UU	1804	1914KSY	1917LTC	麵	23	3	3	20
UU	1805	1917LTC	1914KSY	蛋糕	23	4	4	20
UU	1806	1914KSY	1917LTC	你,甚麼	23	5	5	20
UU	1807	1917LTC	1914KSY	我,食,蛋糕	23	6	6	20
UU	1808	1914KSY	1917LTC	肥	23	7	7	20
UU	1809	1914KSY	1917LTC	你,一起玩耍,手提電話	23	8	7	20
UU	1810	1917LTC	1914KSY	你,肥,我	23	9	8	20
UU	1811	1917LTC	1914KSY	OK	23	10	8	20
UU	1812	1914KSY	1917LTC	你,母親節,做甚麼	23	11	9	20
UU	1813	1917LTC	1914KSY	飲茶	23	12	10	20
UU	1814	1914KSY	1917LTC	我,去,酒樓	23	13	11	20
UU	1815	1917LTC	1914KSY	買,蛋糕	23	14	12	20
UU	1816	1914KSY	1917LTC	媽媽,爺爺／公公,嫲嫲／婆婆	23	15	13	20
UU	1817	1917LTC	1914KSY	爸爸,媽媽,弟弟,弟弟,嫲嫲／婆婆	23	16	14	20
UU	1818	1914KSY	1917LTC	甚麼,蛋糕	23	17	15	20
UU	1819	1917LTC	1914KSY	芝士,藍色,士多啤梨,蛋糕	23	18	16	20
UU	1820	1914KSY	1917LTC	我,鍾意,朱古力,蛋糕	23	19	17	20
UU	1821	1917LTC	1914KSY	鍾意,芒果,蛋糕	23	20	18	20
UU	1822	1917LTC	1914KSY	拜拜	23	21	18	20
UU	1823	1914KSY	1917LTC	你,談話,開心	23	22	19	20
UU	1824	1917LTC	1914KSY	開心	23	23	20	20
UU	1825	1914KSY	1917LTC	你,看電視,夜晚	23	24	21	20
UU	1826	1917LTC	1914KSY	你,有,甚麼,談話,嗎	23	25	22	20
UU	1827	1917LTC	1914KSY	有	23	26	22	20
UU	1828	1917LTC	1914KSY	拜拜	23	27	22	20
UU	1829	1914KSY	1917LTC	拜拜	23	28	23	20
UU	1874	1609LSM	1908CCK	你好	24	1	1	4
UU	1875	1908CCK	1609LSM	你,你好	24	2	2	4
UU	1876	1609LSM	1908CCK	玩電腦	24	3	3	4
UU	1877	1908CCK	1609LSM	聽歌	24	4	4	4
UU	1878	1908CCK	1609LSM	慢慢行	24	5	4	4
UU	1879	1609LSM	1908CCK	OK	24	6	5	4
UU	1880	1908CCK	1609LSM	薯條	24	7	6	4
UU	1881	1609LSM	1908CCK	魚蛋,香腸	24	8	7	4
UU	1882	1908CCK	1609LSM	鍾意,飲,可樂	24	9	8	4
UU	1883	1609LSM	1908CCK	益力多,麥精	24	10	9	4
UU	1884	1608LKH	1609LSM	你好,你好	25	1	1	2
UU	1885	1609LSM	1608LKH	雪糕	25	2	2	2
UU	1886	1608LKH	1609LSM	零食鋪	25	3	3	2
UU	1887	1608LKH	1609LSM	可樂	25	4	3	2
UU	1888	1609LSM	1608LKH	看醫生	25	5	4	2
UU	1889	1609LSM	1608LKH	拜拜	25	6	4	2
UU	1890	1610CLY	1907CMC	文化中心	26	1	1	5
UU	1891	1610CLY	1907CMC	打招呼	26	2	1	5
UU	1892	1907CMC	1610CLY	做甚麼	26	3	2	5
UU	1894	1907CMC	1610CLY	開心,問句	26	4	2	5
UU	1897	1907CMC	1610CLY	拜拜	26	5	2	5
UU	2007	1902YL	1906HYN	你好	27	1	1	17
UU	2008	1906HYN	1902YL	你好	27	2	2	17
UU	2009	1902YL	1906HYN	你好	27	3	3	17
UU	2010	1902YL	1906HYN	你好	27	4	3	17
UU	2011	1906HYN	1902YL	你好	27	5	4	17
UU	2012	1902YL	1906HYN	拜拜,粥	27	6	5	17
UU	2013	1902YL	1906HYN	廁所	27	7	5	17
UU	2016	1906HYN	1902YL	你好	27	8	6	17
UU	2017	1902YL	1906HYN	爸爸	27	9	7	17
UU	2018	1906HYN	1902YL	爸爸	27	10	8	17
UU	2019	1902YL	1906HYN	哥哥,爸爸	27	11	9	17
UU	2020	1906HYN	1902YL	哥哥,爸爸	27	12	10	17
UU	2022	1906HYN	1902YL	姐姐,爸爸,媽媽	27	13	10	17
UU	2021	1902YL	1903CHY	你好	28	1	1	16
UU	2023	1903CHY	1902YL	你好	28	2	2	16
UU	2024	1903CHY	1902YL	拜拜	28	3	2	16
UU	2129	1905LYY	1904MKL	你好	29	1	1	18
UU	2132	1904MKL	1905LYY	你好	29	2	2	18
UU	2133	1905LYY	1904MKL	你,鍾意,食,甚麼	29	3	3	18
UU	2136	1904MKL	1905LYY	我要,食,蝦條,麵,香蕉	29	4	4	18
UU	2138	1905LYY	1904MKL	我,鍾意,食,蛋卷,啫喱	29	5	5	18
UU	2141	1904MKL	1905LYY	我要,飲,橙汁,水,蘋果汁	29	6	6	18
UU	2142	1905LYY	1904MKL	我,鍾意,菊花茶,紙包果汁,益力多	29	7	7	18
UU	2144	1905LYY	1904MKL	拜拜	29	8	7	18
UU	2146	1904MKL	1905LYY	你好	30	1	1	18
UU	2147	1905LYY	1904MKL	你好	30	2	2	18
UU	2150	1904MKL	1905LYY	拜拜	30	3	3	18
UU	2151	1904MKL	1905LYY	你,鍾意,去,哪裡	30	4	3	18
UU	2154	1905LYY	1904MKL	我,鍾意,學校	30	5	4	18
UU	2155	1905LYY	1904MKL	你,嗎	30	6	4	18
UU	2156	1904MKL	1905LYY	我,鍾意,去,服裝店	30	7	5	18
UU	2157	1905LYY	1904MKL	襪,嗎	30	8	6	18
UU	2158	1904MKL	1905LYY	是	30	9	7	18
UU	2159	1904MKL	1905LYY	鍾意,狗,嗎	30	10	7	18
UU	2160	1905LYY	1904MKL	鍾意	30	11	8	18
UU	2161	1905LYY	1904MKL	鍾意,樹,嗎	30	12	8	18
UU	2162	1904MKL	1905LYY	鍾意	30	13	9	18
UU	2163	1904MKL	1905LYY	鍾意,新年,嗎	30	14	9	18
UU	2164	1905LYY	1904MKL	鍾意	30	15	10	18
UU	2165	1905LYY	1904MKL	煙花	30	16	10	18
UU	2166	1904MKL	1905LYY	鍾意	30	17	11	18
UU	2167	1905LYY	1904MKL	鍾意	30	18	12	18
UU	2168	1905LYY	1904MKL	地鐵	30	19	12	18
UU	2169	1904MKL	1905LYY	鍾意	30	20	13	18
UU	2170	1905LYY	1904MKL	鍾意,學校,嗎	30	21	14	18
UU	2171	1904MKL	1905LYY	鍾意	30	22	15	18
UU	2172	1918WHY	1917LTC	你,開心,嗎	31	1	1	21
UU	2173	1917LTC	1918WHY	我,OK	31	2	2	21
UU	2398	1911WWS	1913CHY	你好	32	1	1	19
UU	2399	1913CHY	1911WWS	你好	32	2	2	19
UU	2402	1913CHY	1911WWS	開心	32	3	2	19
UU	2403	1913CHY	1911WWS	多謝	32	4	2	19
UU	2404	1911WWS	1913CHY	多謝	32	5	3	19
UU	2406	1913CHY	1911WWS	你,靚	32	6	4	19
UU	2408	1911WWS	1913CHY	佢,去,洗手間	32	7	5	19
UU	2410	1911WWS	1913CHY	拜拜	32	8	5	19
UU	2411	1913CHY	1911WWS	多謝	32	9	6	19
UU	2374	1617TLC	1911WWS	你好	33	1	1	15
UU	2427	1911WWS	1617TLC	你好	33	2	2	15
UU	2429	1617TLC	1911WWS	你好	33	3	3	15
UU	2432	1911WWS	1617TLC	你好	33	4	4	15
UU	2436	1911WWS	1617TLC	你好	33	5	4	15
UU	2437	1911WWS	1617TLC	你好	33	6	4	15
UU	2438	1911WWS	1617TLC	機械人,遊戲機,或者	33	7	4	15
UU	2440	1903CHY	1902YL	你好	34	1	1	16
UU	2441	1902YL	1903CHY	你好	34	2	2	16
UU	2442	1903CHY	1902YL	一起玩耍	34	3	3	16
UU	2443	1903CHY	1902YL	嗎	34	4	3	16
UU	2551	1602IKK	1901TTT	你好	35	1	1	1
UU	2552	1901TTT	1602IKK	你好	35	2	2	1
UU	2553	1602IKK	1901TTT	你好	35	3	3	1
UU	2554	1901TTT	1602IKK	我,食,雞脾	35	4	4	1
UU	2555	1602IKK	1901TTT	我,食,燒賣	35	5	5	1
UU	2556	1602IKK	1901TTT	我,食,雞脾	35	6	5	1
UU	2557	1602IKK	1901TTT	錢	35	7	5	1
UU	2558	1602IKK	1901TTT	我,食,雞脾	35	8	5	1
UU	2559	1602IKK	1901TTT	我,食,蛋卷	35	9	5	1
UU	2560	1602IKK	1901TTT	我,食,香腸	35	10	5	1
UU	2561	1602IKK	1901TTT	我,食,粽	35	11	5	1
UU	2562	1901TTT	1602IKK	我,飲,牛奶	35	12	6	1
UU	2563	1602IKK	1901TTT	我,飲,蘋果汁,好食	35	13	7	1
UU	2564	1602IKK	1901TTT	我,打招呼	35	14	7	1
UU	2565	1602IKK	1901TTT	一起玩耍	35	15	7	1
UU	2566	1901TTT	1602IKK	OK	35	16	8	1
UU	2567	1602IKK	1901TTT	我,食,雞脾	35	17	9	1
UU	2568	1602IKK	1901TTT	商場,右,食,蝦條	35	18	9	1
UU	2569	1901TTT	1602IKK	酒樓,食,牛肉	35	19	10	1
UU	2570	1602IKK	1901TTT	我,食,雞翼	35	20	11	1
UU	2571	1602IKK	1901TTT	記得,食,肉	35	21	11	1
UU	2572	1901TTT	1602IKK	多謝	35	22	12	1
UU	2573	1602IKK	1901TTT	多謝,哥哥,有,睡房,收拾玩具	35	23	13	1
UU	2574	1901TTT	1602IKK	拜拜	35	24	14	1
UU	2575	1602IKK	1901TTT	我,食,肉	35	25	15	1
UU	2576	1901TTT	1602IKK	你好	35	26	16	1
UU	2577	1602IKK	1901TTT	我,食,腸粉,牛肉	35	27	17	1
UU	2578	1602IKK	1901TTT	你,買,機械人,遊戲機	35	28	17	1
UU	2579	1602IKK	1901TTT	不明白,媽媽	35	29	17	1
UU	2580	1602IKK	1901TTT	你好	35	30	17	1
UU	2581	1602IKK	1901TTT	拜拜,姐姐	35	31	17	1
UU	2582	1602IKK	1901TTT	你好	35	32	17	1
UU	2583	1602IKK	1901TTT	你好	35	33	17	1
UU	2584	1602IKK	1901TTT	拜拜	35	34	17	1
UU	2585	1602IKK	1901TTT	你好	35	35	17	1
UU	2586	1602IKK	1901TTT	我,食,燒賣	35	36	17	1
UU	2587	1602IKK	1901TTT	我,食,燒賣	35	37	17	1
UU	2588	1602IKK	1901TTT	你好	35	38	17	1
UU	2589	1602IKK	1901TTT	你好	35	39	17	1
UU	2590	1602IKK	1901TTT	我,食,蛋糕	35	40	17	1
UU	2591	1602IKK	1901TTT	我,食,蛋糕	35	41	17	1
UU	2592	1901TTT	1602IKK	你好	35	42	18	1
UU	2593	1901TTT	1602IKK	OK	35	43	18	1
UU	2594	1901TTT	1602IKK	你好	35	44	18	1
UU	2595	1602IKK	1901TTT	我,食,燒賣	35	45	19	1
UU	2596	1901TTT	1602IKK	你好	35	46	20	1
UU	2597	1901TTT	1602IKK	你好	35	47	20	1
UU	2598	1901TTT	1602IKK	我,食,雞脾	35	48	20	1
UU	2599	1901TTT	1602IKK	我,食,雞脾	35	49	20	1
UU	2600	1602IKK	1901TTT	我,食,雞脾	35	50	21	1
UU	2601	1602IKK	1901TTT	我,食,雞脾	35	51	21	1
UU	2602	1602IKK	1901TTT	我,食,雞脾	35	52	21	1
UU	2603	1602IKK	1901TTT	打招呼	35	53	21	1
UU	2604	1602IKK	1901TTT	OK	35	54	21	1
UU	2605	1602IKK	1901TTT	你好	35	55	21	1
UU	2606	1602IKK	1901TTT	你好	35	56	21	1
UU	2607	1602IKK	1901TTT	我,食,雞脾	35	57	21	1
UU	2608	1602IKK	1901TTT	拜拜	35	58	21	1
UU	2609	1602IKK	1901TTT	拜拜	35	59	21	1
UU	2610	1602IKK	1901TTT	拜拜	35	60	21	1
UU	2611	1901TTT	1602IKK	拜拜	35	61	22	1
UU	2612	1602IKK	1901TTT	拜拜	35	62	23	1
UU	2613	1901TTT	1602IKK	拜拜	35	63	24	1
UU	2614	1901TTT	1602IKK	拜拜	35	64	24	1
UU	2615	1602IKK	1901TTT	拜拜	35	65	25	1
UU	2616	1602IKK	1901TTT	拜拜	35	66	25	1
UU	2617	1602IKK	1901TTT	拜拜	35	67	25	1
UU	2618	1602IKK	1901TTT	拜拜	35	68	25	1
UU	2687	1614TS	1615LTS	打招呼	36	1	1	11
UU	2689	1615LTS	1614TS	你好	36	2	2	11
UU	2693	1614TS	1615LTS	你,鍾意,食	36	3	3	11
UU	2694	1615LTS	1614TS	雪糕	36	4	4	11
UU	2696	1614TS	1615LTS	我,薄餅	36	5	5	11
UU	2697	1615LTS	1614TS	我,拜拜	36	6	6	11
UU	2763	1614TS	1615LTS	你,打招呼	37	1	1	11
UU	2764	1614TS	1615LTS	你,去,哪裡	37	2	1	11
UU	2765	1615LTS	1614TS	我,打招呼,幫忙	37	3	2	11
UU	2766	1615LTS	1614TS	快餐店,食,麵包	37	4	2	11
UU	2769	1615LTS	1614TS	我,飲,蘋果汁	37	5	2	11
UU	2772	1614TS	1615LTS	你,廳,做甚麼	37	6	3	11
UU	2775	1615LTS	1614TS	商場,食,麵包,塗,花生醬	37	7	4	11
UU	2779	1615LTS	1614TS	我,塗,麵包,塗,花生醬	37	8	4	11
UU	2780	1614TS	1615LTS	餐廳	37	9	5	11
UU	2785	1615LTS	1614TS	我,行,酒樓,食飯	37	10	6	11
STU	266	1613YWS	ST01	開心	38	1	1	23
STU	267	ST01	1613YWS	我,飲	38	2	2	23
STU	268	ST01	1613YWS	你,悶	38	3	2	23
STU	269	1613YWS	ST01	你,開心	38	4	3	23
STU	270	ST01	1613YWS	我,打招呼	38	5	4	23
STU	271	ST01	1613YWS	我,打招呼	38	6	4	23
STU	272	1613YWS	ST01	打招呼	38	7	5	23
STU	273	ST01	1613YWS	一起玩耍	38	8	6	23
STU	274	1613YWS	ST01	一起玩耍	38	9	7	23
STU	275	ST01	1613YWS	你,食,叉燒包	38	10	8	23
STU	276	ST01	1613YWS	你,飲,叉燒包,腸粉,牛肉	38	11	8	23
STU	277	1613YWS	ST01	我,食,牛肉	38	12	9	23
STU	278	ST01	1613YWS	你,飲,茶	38	13	10	23
STU	280	1613YWS	ST01	拜拜	38	14	11	23
STU	281	1613YWS	ST01	拜拜	38	15	11	23
STU	282	ST01	1613YWS	拜拜	38	16	12	23
STU	283	ST01	1613YWS	我,打招呼	39	1	1	23
STU	284	1613YWS	ST01	職業治療師,開心	39	2	2	23
STU	285	1613YWS	ST01		39	3	2	23
STU	286	ST01	1613YWS	你,食,通心粉	39	4	3	23
STU	287	1613YWS	ST01	我,食,腸粉	39	5	4	23
STU	288	ST01	1613YWS	我,食,雞蛋	39	6	5	23
STU	289	ST01	1613YWS	你,飲,水,開心	39	7	5	23
STU	290	1613YWS	ST01	飯,開心,哥哥,波	39	8	6	23
STU	291	1613YWS	ST01		39	9	6	23
STU	292	ST01	1613YWS	我,看書	39	10	7	23
STU	293	1613YWS	ST01	我,開心	39	11	8	23
STU	294	1613YWS	ST01		39	12	8	23
STU	295	1613YWS	ST01		39	13	8	23
STU	296	1613YWS	ST01		39	14	8	23
STU	297	1613YWS	ST01	拜拜	39	15	8	23
STU	298	ST01	1613YWS	拜拜	39	16	9	23
STU	299	1613YWS	ST01	打招呼	40	1	1	23
STU	300	ST01	1613YWS	打招呼,開心	40	2	2	23
STU	301	1613YWS	ST01	我,食,腸粉,牛肉	40	3	3	23
STU	302	ST01	1613YWS	我,食,雞脾	40	4	4	23
STU	303	1613YWS	ST01	你,飲	40	5	5	23
STU	304	ST01	1613YWS	我,飲,麥精,維他奶	40	6	6	23
STU	305	ST01	1613YWS	你,飲	40	7	6	23
STU	306	1613YWS	ST01	我,飲,水	40	8	7	23
STU	307	ST01	1613YWS	你,開心	40	9	8	23
STU	308	1613YWS	ST01	我,開心	40	10	9	23
STU	309	1613YWS	ST01	你,食	40	11	9	23
STU	310	ST01	1613YWS	蛋撻	40	12	10	23
STU	311	1613YWS	ST01		40	13	11	23
STU	312	1613YWS	ST01		40	14	11	23
STU	313	1613YWS	ST01	我,食,餅乾	40	15	11	23
STU	314	ST01	1613YWS	拜拜	40	16	12	23
STU	315	ST01	1613YWS		40	17	12	23
STU	316	1613YWS	ST01		40	18	13	23
STU	317	1613YWS	ST01	我,拜拜	40	19	13	23
STU	339	ST01	1612HHP	長袖衫,醫生,,,,	41	1	1	22
STU	341	1612HHP	ST01	哥哥,行,雞,,,	41	2	2	22
STU	342	ST01	1612HHP	甚麼,龜,,,,	41	3	3	22
STU	343	ST01	1612HHP	不明白,老鼠,,,,	41	4	3	22
STU	371	ST01	1614TS	你,,,,,	42	1	1	24
STU	372	1614TS	ST01	羊,,,,,	42	2	2	24
STU	373	1614TS	ST01	媽媽,弟弟,,,,	42	3	2	24
STU	374	1614TS	ST01	媽媽,,,,,	42	4	2	24
STU	1697	ST02	1918WHY	你好	43	1	1	29
STU	1698	1918WHY	ST02	你好	43	2	2	29
STU	1700	ST02	1918WHY	你好	43	3	3	29
STU	1701	1918WHY	ST02	你好	43	4	4	29
STU	1702	ST02	1918WHY	你,剛才,做甚麼	43	5	5	29
STU	1703	1918WHY	ST02	我,上課	43	6	6	29
STU	1704	ST02	1918WHY	有,無,留心聽	43	7	7	29
STU	1705	1918WHY	ST02	有	43	8	8	29
STU	1706	ST02	1918WHY	做得好	43	9	9	29
STU	1707	ST02	1918WHY	拜拜	43	10	9	29
STU	1708	1918WHY	ST02	拜拜	43	11	10	29
STU	1709	ST02	1918WHY	你好	44	1	1	29
STU	1710	1918WHY	ST02	你好	44	2	2	29
STU	1711	ST02	1918WHY	你,鍾意,食,甚麼	44	3	3	29
STU	1712	1918WHY	ST02	蝦	44	4	4	29
STU	1713	ST02	1918WHY	你,鍾意,去,哪裡	44	5	5	29
STU	1714	1918WHY	ST02	我,媽媽,美食廣場	44	6	6	29
STU	1715	ST02	1918WHY	你,鍾意,做甚麼	44	7	7	29
STU	1716	1918WHY	ST02	玩電腦	44	8	8	29
STU	1717	ST02	1918WHY	OK,拜拜	44	9	9	29
STU	1718	1918WHY	ST02	OK,拜拜	44	10	10	29
STU	1719	ST02	1918WHY	你好	45	1	1	29
STU	1720	1918WHY	ST02	你好	45	2	2	29
STU	1721	1918WHY	ST02	你好	45	3	2	29
STU	1722	ST02	1918WHY	你,昨天,去,哪裡	45	4	3	29
STU	1723	1918WHY	ST02	廳	45	5	4	29
STU	1724	ST02	1918WHY	OK	45	6	5	29
STU	1725	ST02	1918WHY	做甚麼	45	7	5	29
STU	1726	1918WHY	ST02	OK	45	8	6	29
STU	1727	ST02	1918WHY	做甚麼	45	9	7	29
STU	1728	1918WHY	ST02	上課	45	10	8	29
STU	1729	ST02	1918WHY	做得好	45	11	9	29
STU	1730	ST02	1918WHY	開心	45	12	9	29
STU	1731	1918WHY	ST02	開心	45	13	10	29
STU	1732	ST02	1918WHY	我,昨天,去,郊野公園	45	14	11	29
STU	1733	ST02	1918WHY	我,開心	45	15	11	29
STU	1734	1918WHY	ST02	你	45	16	12	29
STU	1735	1918WHY	ST02	我	45	17	12	29
STU	1736	1918WHY	ST02	我,玩電腦	45	18	12	29
STU	1737	ST02	1918WHY	OK,拜拜	45	19	13	29
STU	1738	1918WHY	ST02	拜拜	45	20	14	29
STU	1739	ST02	1915LWJ	你好	46	1	1	26
STU	1740	1915LWJ	ST02	你好	46	2	2	26
STU	1741	ST02	1915LWJ	你,剛才,做甚麼	46	3	3	26
STU	1742	1915LWJ	ST02	我,玩遊戲	46	4	4	26
STU	1743	ST02	1915LWJ	你,開心	46	5	5	26
STU	1744	1915LWJ	ST02	我,OK	46	6	6	26
STU	1745	ST02	1915LWJ	做得好	46	7	7	26
STU	1746	1915LWJ	ST02	OK,多謝	46	8	8	26
STU	1747	ST02	1915LWJ	拜拜	46	9	9	26
STU	1748	1915LWJ	ST02	拜拜	46	10	10	26
STU	1749	ST02	1915LWJ	你好	47	1	1	26
STU	1750	1915LWJ	ST02	你好	47	2	2	26
STU	1751	ST02	1915LWJ	你,鍾意,食,甚麼	47	3	3	26
STU	1752	1915LWJ	ST02	雪條	47	4	4	26
STU	1753	ST02	1915LWJ	OK	47	5	5	26
STU	1754	ST02	1915LWJ	你,昨天,做甚麼	47	6	5	26
STU	1755	1915LWJ	ST02	踢波	47	7	6	26
STU	1756	ST02	1915LWJ	開心	47	8	7	26
STU	1757	ST02	1915LWJ	拜拜	47	9	7	26
STU	1758	1915LWJ	ST02	拜拜	47	10	8	26
STU	1759	ST02	1914KSY	你好	48	1	1	25
STU	1760	ST02	1914KSY	你好	48	2	1	25
STU	1761	1914KSY	ST02	你好	48	3	2	25
STU	1762	ST02	1914KSY	你,剛才,做甚麼	48	4	3	25
STU	1763	1914KSY	ST02	我,上課	48	5	4	25
STU	1764	ST02	1914KSY	你好	48	6	5	25
STU	1765	1914KSY	ST02	你好	48	7	6	25
STU	1766	ST02	1914KSY	你,剛才,做甚麼	48	8	7	25
STU	1771	1914KSY	ST02	我,上課	48	9	8	25
STU	1772	ST02	1914KSY	有,無,留心聽	48	10	9	25
STU	1777	ST02	1914KSY	做得好	48	11	9	25
STU	1779	ST02	1914KSY	拜拜	48	12	9	25
STU	1782	1914KSY	ST02	拜拜	48	13	10	25
STU	1767	ST10	1917LTC	你好	49	1	1	50
STU	1768	ST10	1917LTC	你好	49	2	1	50
STU	1769	1917LTC	ST10	你好	49	3	2	50
STU	1770	ST10	1917LTC	你,剛才,做甚麼	49	4	3	50
STU	1773	1917LTC	ST10	我,上課	49	5	4	50
STU	1774	ST10	1917LTC	有,無,留心聽	49	6	5	50
STU	1775	1914KSY	ST02	有	49	7	6	50
STU	1776	1917LTC	ST10	有	49	8	7	50
STU	1778	ST10	1917LTC	做得好	49	9	8	50
STU	1780	ST10	1917LTC	拜拜	49	10	8	50
STU	1781	1917LTC	ST10	拜拜	49	11	9	50
STU	1783	ST02	1914KSY	你好	50	1	1	25
STU	1784	1914KSY	ST02	你好	50	2	2	25
STU	1787	ST02	1914KSY	你,鍾意,食,甚麼	50	3	3	25
STU	1793	1914KSY	ST02	菜	50	4	4	25
STU	1795	ST02	1914KSY	你,鍾意,去,哪裡	50	5	5	25
STU	1797	1914KSY	ST02	酒樓	50	6	6	25
STU	1798	ST02	1914KSY	你,鍾意,做甚麼	50	7	7	25
STU	1799	1914KSY	ST02	我,鍾意,做運動	50	8	8	25
STU	1800	ST02	1914KSY	OK,拜拜	50	9	9	25
STU	1801	1914KSY	ST02	OK,拜拜	50	10	10	25
STU	1785	ST10	1917LTC	你好	51	1	1	50
STU	1786	ST10	1917LTC	你,鍾意,食,甚麼	51	2	1	50
STU	1788	1917LTC	ST10	蛋撻	51	3	2	50
STU	1789	ST10	1917LTC	你,鍾意,去,哪裡	51	4	3	50
STU	1790	1917LTC	ST10	百貨公司	51	5	4	50
STU	1791	ST10	1917LTC	你,鍾意,做甚麼	51	6	5	50
STU	1792	1917LTC	ST10	聽歌	51	7	6	50
STU	1794	ST10	1917LTC	OK,拜拜	51	8	7	50
STU	1796	1917LTC	ST10	拜拜	51	9	8	50
STU	1850	ST03	1607TCK	你,去,哪裡,食,飯	52	1	1	31
STU	1852	1607TCK	ST03	餐廳	52	2	2	31
STU	1854	ST03	1607TCK	你,食,甚麼	52	3	3	31
STU	1856	1607TCK	ST03	燒賣	52	4	4	31
STU	1857	ST03	1607TCK	你,去,哪裡,食,飯	52	5	5	31
STU	1860	1607TCK	ST03	廁所,酒樓	52	6	6	31
STU	1862	ST03	1607TCK	你,食,甚麼	52	7	7	31
STU	1866	ST03	1607TCK	你好	52	8	7	31
STU	1867	1607TCK	ST03	你好	52	9	8	31
STU	1868	ST03	1607TCK	你,食,甚麼	52	10	9	31
STU	1870	1607TCK	ST03	雪糕	52	11	10	31
STU	1871	ST03	1607TCK	OK,拜拜	52	12	11	31
STU	1873	1607TCK	ST03	拜拜	52	13	12	31
STU	1851	ST04	1604TTM	你好	53	1	1	32
STU	1853	1604TTM	ST04	你好,你好,你好	53	2	2	32
STU	1855	ST04	1604TTM	去,哪裡,食,問句	53	3	3	32
STU	1858	1604TTM	ST04	你好,酒樓	53	4	4	32
STU	1859	ST04	1604TTM	食,甚麼	53	5	5	32
STU	1861	1604TTM	ST04	雞蛋	53	6	6	32
STU	1863	ST04	1604TTM	飲,甚麼	53	7	7	32
STU	1865	1604TTM	ST04	飲,飲,飲,橙汁,橙汁,維他奶	53	8	8	32
STU	1869	1604TTM	ST04	拜拜	53	9	8	32
STU	1872	ST04	1604TTM	你好	53	10	9	32
STU	1898	1908CCK	ST04	我	54	1	1	#N/A	1
STU	1899	1908CCK	ST04	我	54	2	1	#N/A	1
STU	1902	ST03	1606WHW	你好	55	1	1	30
STU	1908	1606WHW	ST03	食飯	55	2	2	30
STU	1911	ST03	1606WHW	鍾意,食,蛋糕,嗎	55	3	3	30
STU	1913	1606WHW	ST03	好食	55	4	4	30
STU	1915	ST03	1606WHW	益力多,或者,水	55	5	5	30
STU	1919	1606WHW	ST03	蘋果汁	55	6	6	30
STU	1921	ST03	1606WHW	我,鍾意,飲,麥精	55	7	7	30
STU	1925	ST03	1606WHW	你,開心,嗎	55	8	7	30
STU	1934	1606WHW	ST03	一起玩耍	55	9	8	30
STU	1936	ST03	1606WHW	OK	55	10	9	30
STU	1938	ST03	1606WHW	你,食,飯	55	11	9	30
STU	1940	ST03	1606WHW	拜拜	55	12	9	30
STU	1942	1606WHW	ST03	拜拜	55	13	10	30
STU	1900	1605HCN	ST04	爸爸,你好	56	1	1	33
STU	1901	ST04	1605HCN	你好	56	2	2	33
STU	1903	ST04	1605HCN	你,去,哪裡,食,飯	56	3	2	33
STU	1904	ST04	1605HCN	洗／抹面	56	4	2	33
STU	1905	1605HCN	ST04	錢,毛巾	56	5	3	33
STU	1906	ST04	1605HCN	鍾意,飲,甚麼	56	6	4	33
STU	1907	1605HCN	ST04	益力多	56	7	5	33
STU	1909	1605HCN	ST04	幫忙,聽電話	56	8	5	33
STU	1910	ST04	1605HCN	你好	56	9	6	33
STU	1912	1605HCN	ST04	剪指甲	56	10	7	33
STU	1914	ST04	1605HCN	你,鍾意,甚麼	56	11	8	33
STU	1918	1605HCN	ST04	相機,飛機,酒樓,燒賣,麵包	56	12	9	33
STU	1920	ST04	1605HCN	你好	56	13	10	33
STU	1923	1605HCN	ST04	OK	56	14	11	33
STU	1924	ST04	1605HCN	我,打招呼,開心	56	15	12	33
STU	1926	ST04	1605HCN	我,開心	56	16	12	33
STU	1928	ST04	1605HCN	你,鍾意,甚麼	56	17	12	33
STU	1929	1605HCN	ST04	唱歌	56	18	13	33
STU	1931	ST04	1605HCN	我,鍾意,玩電腦	56	19	14	33
STU	1932	1605HCN	ST04	彈琴	56	20	15	33
STU	1933	ST04	1605HCN	你,何時,食飯	56	21	16	33
STU	1939	ST04	1605HCN	你,食,甚麼	56	22	16	33
STU	1941	1605HCN	ST04	火腿	56	23	17	33
STU	1944	ST04	1605HCN	我,拜拜	56	24	18	33
STU	1945	ST04	1605HCN	我,拜拜	56	25	18	33
STU	1946	ST04	1605HCN	你,拜拜,嗎	56	26	18	33
STU	1948	ST04	1605HCN	你,我,拜拜,OK,嗎	56	27	18	33
STU	1949	1605HCN	ST04	OK,多謝,哥哥	56	28	19	33
STU	1950	ST04	1605HCN	多謝,拜拜	56	29	20	33
STU	1916	1611TKC	ST05	OK,一起玩耍	57	1	1	34
STU	1917	ST05	1611TKC	你好	57	2	2	34
STU	1922	1611TKC	ST05	開心	57	3	3	34
STU	1927	1611TKC	ST05	橙	57	4	3	34
STU	1930	ST05	1611TKC	好食	57	5	4	34
STU	1935	1611TKC	ST05	你,鍾意,一起玩耍	57	6	5	34
STU	1937	ST05	1611TKC	OK	57	7	6	34
STU	1943	1611TKC	ST05	旅行	57	8	7	34
STU	1947	ST05	1611TKC	去,旅行	57	9	8	34
STU	1951	ST05	1611TKC	拜拜	57	10	8	34
STU	1952	ST06	1906HYN	你好	58	1	1	40
STU	1953	ST06	1906HYN	你好	58	2	1	40
STU	1954	ST06	1906HYN	你好	58	3	1	40
STU	1955	1906HYN	ST06	爸爸,OK	58	4	2	40
STU	1956	1906HYN	ST06	BB	58	5	2	40
STU	1957	ST06	1906HYN	你好	58	6	3	40
STU	1958	ST06	1906HYN	言語治療師	58	7	3	40
STU	1959	1906HYN	ST06	姐姐,姐姐	58	8	4	40
STU	1960	ST06	1906HYN	我要,食,蘋果	58	9	5	40
STU	1961	1906HYN	ST06	BB,你好,飲	58	10	6	40
STU	1962	1906HYN	ST06	飲,食	58	11	6	40
STU	1963	ST06	1906HYN	洗／抹面,梳頭	58	12	7	40
STU	1964	1906HYN	ST06	坐,糖	58	13	8	40
STU	1965	ST06	1906HYN	蝦條	58	14	9	40
STU	1966	1906HYN	ST06	麵包,粥	58	15	10	40
STU	1967	ST06	1906HYN	開心	58	16	11	40
STU	1968	ST06	1906HYN	拜拜	58	17	11	40
STU	1969	ST07	1902YL	你好	59	1	1	41
STU	1970	ST07	1902YL	OK	59	2	1	41
STU	1971	ST07	1902YL	多謝	59	3	1	41
STU	1972	1902YL	ST07	多謝	59	4	2	41
STU	1973	1902YL	ST07	多謝	59	5	2	41
STU	1974	ST07	1902YL	你好	59	6	3	41
STU	1977	1902YL	ST07	你好	59	7	4	41
STU	1980	1902YL	ST07	橙,廁所,首飾	59	8	4	41
STU	1982	1902YL	ST07	巴士,燈	59	9	4	41
STU	1983	ST07	1902YL	打招呼	59	10	5	41
STU	1984	ST07	1902YL	開心	59	11	5	41
STU	1986	ST07	1902YL	洗／抹面	59	12	5	41
STU	1989	ST07	1902YL	OK	59	13	5	41
STU	1990	ST07	1902YL	你好	59	14	5	41
STU	1992	ST07	1902YL	你好	59	15	5	41
STU	1993	1902YL	ST07	你好	59	16	6	41
STU	1994	ST07	1902YL	談話,開心,嗎	59	17	7	41
STU	1995	1902YL	ST07	OK	59	18	8	41
STU	1996	ST07	1902YL	上午,食,甚麼	59	19	9	41
STU	1997	1902YL	ST07	拜拜,拜拜	59	20	10	41
STU	2014	ST06	1902YL	你好	59	21	11	41
STU	2015	1902YL	ST06	多謝	59	22	12	41
STU	2025	ST07	1902YL	你好	59	23	13	41
STU	2026	1902YL	ST07	幫忙,佢地	59	24	14	41
STU	2027	1902YL	ST07	老師	59	25	14	41
STU	2028	1902YL	ST07	售貨員	59	26	14	41
STU	2029	ST07	1902YL	不開心	59	27	15	41
STU	2031	1902YL	ST07	校車,聖誕慶祝會,排隊等車	59	28	16	41
STU	2033	ST07	1902YL	洗／抹面	59	29	17	41
STU	2034	1902YL	ST07	塗	59	30	18	41
STU	2036	1902YL	ST07	4,左	59	31	18	41
STU	2038	1902YL	ST07	聖誕咭	59	32	18	41
STU	2039	1902YL	ST07	聖誕咭,電腦	59	33	18	41
STU	2040	1902YL	ST07	電腦,門	59	34	18	41
STU	2042	1902YL	ST07	新年	59	35	18	41
STU	2044	1902YL	ST07	聖誕老人	59	36	18	41
STU	2045	1902YL	ST07	聖誕花,輕鐵	59	37	18	41
STU	2047	1902YL	ST07	私家車,小巴	59	38	18	41
STU	2048	1902YL	ST07	波鞋	59	39	18	41
STU	2049	1902YL	ST07	校服	59	40	18	41
STU	2052	1902YL	ST07	醫院	59	41	18	41
STU	2053	1902YL	ST07	傷殘人士廁所	59	42	18	41
STU	2054	1902YL	ST07	商場	59	43	18	41
STU	2055	ST07	1902YL	剪腳甲,洗／抹面	59	44	19	41
STU	2057	1902YL	ST07	穿鞋	59	45	20	41
STU	2059	1902YL	ST07	睡覺	59	46	20	41
STU	2060	1902YL	ST07	看書,玩電腦	59	47	20	41
STU	2061	1902YL	ST07	看書,入	59	48	20	41
STU	2064	1902YL	ST07	唔知道,一起玩耍,你	59	49	20	41
STU	2065	1902YL	ST07	幫忙,返回座位	59	50	20	41
STU	2066	1902YL	ST07	坐好,家長日	59	51	20	41
STU	2067	1902YL	ST07	下載,行	59	52	20	41
STU	1975	ST06	1906HYN	你好	60	1	1	40
STU	1976	1906HYN	ST06	姐姐	60	2	2	40
STU	1978	ST06	1906HYN	妹妹	60	3	3	40
STU	1979	1906HYN	ST06	媽媽,你好,媽媽,哥哥	60	4	4	40
STU	1981	ST06	1906HYN	舉手	60	5	5	40
STU	1985	1906HYN	ST06	多謝,OK	60	6	6	40
STU	1987	1906HYN	ST06	多謝,哥哥	60	7	6	40
STU	1988	ST06	1906HYN	打招呼	60	8	7	40
STU	1991	ST06	1906HYN	你好	60	9	7	40
STU	1998	ST06	1906HYN	你好	60	10	7	40
STU	1999	1906HYN	ST06	你好,你好,你好	60	11	8	40
STU	2000	ST06	1906HYN	你,靚	60	12	9	40
STU	2001	1906HYN	ST06	多謝	60	13	10	40
STU	2002	ST06	1906HYN	上午,食,甚麼	60	14	11	40
STU	2003	1906HYN	ST06	糖	60	15	12	40
STU	2004	ST06	1906HYN	OK	60	16	13	40
STU	2005	ST06	1906HYN	拜拜	60	17	13	40
STU	2006	1906HYN	ST06	拜拜	60	18	14	40
STU	2030	ST06	1906HYN	你好	61	1	1	40
STU	2032	ST06	1906HYN	紫菜	61	2	1	40
STU	2035	1906HYN	ST06	媽媽,坐,巴士,波,車,餅乾	61	3	2	40
STU	2037	1906HYN	ST06	糖,你好	61	4	2	40
STU	2041	ST06	1906HYN	你好	61	5	3	40
STU	2043	1906HYN	ST06	你好	61	6	4	40
STU	2046	ST06	1906HYN	你,鍾意,甚麼	61	7	5	40
STU	2050	1906HYN	ST06	牛奶	61	8	6	40
STU	2051	ST06	1906HYN	你,鍾意,食	61	9	7	40
STU	2056	1906HYN	ST06	魚	61	10	8	40
STU	2058	ST06	1906HYN	你,要,魚,嗎	61	11	9	40
STU	2062	1906HYN	ST06	拜拜	61	12	10	40
STU	2063	ST06	1906HYN	拜拜	61	13	11	40
STU	2068	ST07	1905LYY	你好	62	1	1	#N/A
STU	2069	1905LYY	ST07	你好	62	2	2	#N/A
STU	2070	1905LYY	ST07	戴安全帶	62	3	2	#N/A
STU	2071	1905LYY	ST07	碟	62	4	2	#N/A
STU	2072	ST07	1905LYY	拜拜	62	5	3	#N/A
STU	2073	ST07	1905LYY	你好	63	1	1	42
STU	2074	1905LYY	ST07	打招呼	63	2	2	42
STU	2075	ST07	1905LYY	食,甚麼	63	3	3	42
STU	2076	1905LYY	ST07	雪條	63	4	4	42
STU	2077	ST07	1905LYY	好食,嗎	63	5	5	42
STU	2078	1905LYY	ST07	好食	63	6	6	42
STU	2079	ST07	1905LYY	凍,嗎	63	7	7	42
STU	2080	1905LYY	ST07	熱	63	8	8	42
STU	2081	1905LYY	ST07	誰,公園	63	9	8	42
STU	2082	ST07	1905LYY	你,有,無,妹妹	63	10	9	42
STU	2083	1905LYY	ST07	有	63	11	10	42
STU	2084	ST07	1905LYY	有,多,少	63	12	11	42
STU	2085	ST07	1905LYY	有,多,少,妹妹	63	13	11	42
STU	2086	1905LYY	ST07	1	63	14	12	42
STU	2087	ST07	1905LYY	拜拜	63	15	13	42
STU	2088	ST07	1905LYY	你好	64	1	1	42
STU	2089	1905LYY	ST07	打招呼	64	2	2	42
STU	2090	ST07	1905LYY	你,上午,食,甚麼	64	3	3	42
STU	2091	1905LYY	ST07	麵包	64	4	4	42
STU	2092	ST07	1905LYY	你,鍾意,食,麵包,嗎	64	5	5	42
STU	2094	1905LYY	ST07	鍾意	64	6	6	42
STU	2098	1905LYY	ST07	你,鍾意,食,甚麼	64	7	6	42
STU	2100	ST07	1905LYY	我,鍾意,食,百力滋	64	8	7	42
STU	2103	1905LYY	ST07	我,鍾意,食,三文治	64	9	8	42
STU	2106	ST07	1905LYY	你,而家,開心,嗎	64	10	9	42
STU	2108	1905LYY	ST07	開心	64	11	10	42
STU	2109	ST07	1905LYY	我,知道,你,開心	64	12	11	42
STU	2111	1905LYY	ST07	你,有,無,水	64	13	12	42
STU	2112	ST07	1905LYY		64	14	13	42
STU	2093	ST06	1903CHY	你好	65	1	1	36
STU	2095	ST06	1903CHY	你好	65	2	1	36
STU	2096	1903CHY	ST06	你好	65	3	2	36
STU	2097	ST06	1903CHY	食,甚麼	65	4	3	36
STU	2099	ST06	1903CHY	剛才,飲,甚麼	65	5	3	36
STU	2101	1903CHY	ST06	飲,牛奶	65	6	4	36
STU	2102	ST06	1903CHY	有,無,去,洗手間	65	7	5	36
STU	2104	1903CHY	ST06	OK	65	8	6	36
STU	2105	ST06	1903CHY	拜拜	65	9	7	36
STU	2107	1903CHY	ST06	拜拜	65	10	8	36
STU	2110	ST06	1903CHY	你好	66	1	1	36
STU	2113	1903CHY	ST06	你好	66	2	2	36
STU	2114	ST06	1903CHY	開心,嗎	66	3	3	36
STU	2118	1903CHY	ST06	靚	66	4	4	36
STU	2119	ST06	1903CHY	多謝	66	5	5	36
STU	2121	ST06	1903CHY	你,靚	66	6	5	36
STU	2123	ST06	1903CHY	坐,甚麼,上學	66	7	5	36
STU	2125	1903CHY	ST06	校車	66	8	6	36
STU	2127	ST06	1903CHY	做得好	66	9	7	36
STU	2128	ST06	1903CHY	鍾意,上學,嗎	66	10	7	36
STU	2130	1903CHY	ST06	點頭	66	11	8	36
STU	2131	ST06	1903CHY	開心,嗎	66	12	9	36
STU	2134	ST06	1903CHY	拜拜	66	13	9	36
STU	2135	ST06	1903CHY	拜拜	66	14	9	36
STU	2115	ST07	1905LYY	你好	67	1	1	42
STU	2116	ST07	1905LYY	我地,一起玩耍	67	2	1	42
STU	2117	1905LYY	ST07	OK	67	3	2	42
STU	2120	ST07	1905LYY	你,鍾意,玩電腦,嗎	67	4	3	42
STU	2122	1905LYY	ST07	鍾意	67	5	4	42
STU	2124	ST07	1905LYY	你,中午,食,甚麼	67	6	5	42
STU	2126	1905LYY	ST07	麵	67	7	6	42
STU	2137	ST06	1903CHY	你好	68	1	1	36
STU	2139	ST06	1903CHY	你好	68	2	1	36
STU	2140	1903CHY	ST06	你好	68	3	2	36
STU	2143	1903CHY	ST06	上課	68	4	2	36
STU	2145	ST06	1903CHY	你,鍾意,食,甚麼	68	5	3	36
STU	2148	1903CHY	ST06	百力滋,蛋撻	68	6	4	36
STU	2149	ST06	1903CHY	要,百力滋,嗎	68	7	5	36
STU	2152	1903CHY	ST06	OK	68	8	6	36
STU	2153	ST06	1903CHY	拜拜	68	9	7	36
STU	2174	ST06	1905LYY	你好	69	1	1	39
STU	2175	1905LYY	ST06	幫忙	69	2	2	39
STU	2176	1905LYY	ST06	你好,你好	69	3	2	39
STU	2177	ST06	1905LYY	你,食飯,食,甚麼	69	4	3	39
STU	2178	1905LYY	ST06	抽筋	69	5	4	39
STU	2179	1905LYY	ST06	我,食,麵,肉,菜	69	6	4	39
STU	2180	1905LYY	ST06	你,嗎	69	7	4	39
STU	2181	ST06	1905LYY	我,食,意大利粉,菜,橙	69	8	5	39
STU	2182	1905LYY	ST06	拜拜	69	9	6	39
STU	2183	ST06	1903CHY	你好	70	1	1	36
STU	2184	1903CHY	ST06	你好	70	2	2	36
STU	2185	ST06	1903CHY	拜拜	70	3	3	36
STU	2186	1903CHY	ST06	拜拜	70	4	4	36
STU	2187	ST06	1903CHY	你好	70	5	5	36
STU	2188	1903CHY	ST06	你好	70	6	6	36
STU	2189	ST06	1903CHY	你,開心,嗎	70	7	7	36
STU	2190	ST06	1903CHY	你,開心,嗎	70	8	7	36
STU	2191	1903CHY	ST06	開心	70	9	8	36
STU	2192	ST06	1903CHY	你,鍾意,食,甚麼	70	10	9	36
STU	2193	1903CHY	ST06	薯條	70	11	10	36
STU	2194	ST06	1903CHY	我,鍾意,漢堡包	70	12	11	36
STU	2195	ST06	1903CHY	拜拜	70	13	11	36
STU	2196	1903CHY	ST06	拜拜	70	14	12	36
STU	2197	1903CHY	ST06	你好	70	15	12	36
STU	2198	ST06	1904MKL	你好	71	1	1	38
STU	2199	1904MKL	ST06	多謝	71	2	2	38
STU	2200	1904MKL	ST06	你好	71	3	2	38
STU	2201	ST06	1904MKL	燒烤,開心,嗎	71	4	3	38
STU	2202	1904MKL	ST06	開心	71	5	4	38
STU	2203	ST06	1904MKL	好食,嗎	71	6	5	38
STU	2204	1904MKL	ST06	好食	71	7	6	38
STU	2205	ST06	1904MKL	你,流鼻水,嗎	71	8	7	38
STU	2206	1904MKL	ST06	有	71	9	8	38
STU	2207	ST06	1904MKL	有,看醫生,嗎	71	10	9	38
STU	2208	1904MKL	ST06	無	71	11	10	38
STU	2209	ST06	1904MKL	食藥,嗎	71	12	11	38
STU	2210	1904MKL	ST06	有	71	13	12	38
STU	2212	1904MKL	ST06	無	71	14	12	38
STU	2214	1904MKL	ST06	無	71	15	12	38
STU	2216	1917LTC	ST02	你好	72	1	1	28
STU	2217	ST02	1917LTC	你好,你,昨天,夜晚,食,甚麼	72	2	2	28
STU	2218	1917LTC	ST02	我,食,瓜,肉	72	3	3	28
STU	2219	ST02	1917LTC	好食,嗎	72	4	4	28
STU	2220	1917LTC	ST02	OK	72	5	5	28
STU	2221	ST02	1917LTC	端午節,你,去,哪裡	72	6	6	28
STU	2222	1917LTC	ST02	唔知道	72	7	7	28
STU	2223	ST02	1917LTC	明天,我,鍾意,聽歌	72	8	8	28
STU	2224	1917LTC	ST02	昨天,食,蛋糕	72	9	9	28
STU	2225	ST02	1917LTC	為甚麼,生日會,嗎	72	10	10	28
STU	2226	1917LTC	ST02	媽媽,生日會	72	11	11	28
STU	2227	ST02	1917LTC	你,媽媽,生日會,開心	72	12	12	28
STU	2228	ST02	1917LTC	拜拜	72	13	12	28
STU	2276	1903CHY	ST06	你好	73	1	1	37
STU	2277	ST06	1903CHY	你好	73	2	2	37
STU	2278	ST06	1903CHY	你,開心,嗎	73	3	2	37
STU	2279	1903CHY	ST06	開心	73	4	3	37
STU	2280	ST06	1903CHY	拜拜	73	5	4	37
STU	2281	1903CHY	ST06	拜拜	73	6	5	37
STU	2282	ST06	1905LYY	你好	74	1	1	39
STU	2283	1905LYY	ST06	你好	74	2	2	39
STU	2284	ST06	1905LYY	你,痛,嗎	74	3	3	39
STU	2285	1905LYY	ST06	我,無,痛	74	4	4	39
STU	2286	ST06	1905LYY	洗澡,OK,嗎	74	5	5	39
STU	2287	1905LYY	ST06	OK	74	6	6	39
STU	2288	ST06	1905LYY	看醫生,嗎	74	7	7	39
STU	2289	1905LYY	ST06	有	74	8	8	39
STU	2290	ST06	1905LYY	做得好	74	9	9	39
STU	2291	ST06	1905LYY	你,食,甚麼	74	10	9	39
STU	2292	1905LYY	ST06	我,食,叉燒,雞蛋,菜,飯	74	11	10	39
STU	2293	ST06	1905LYY	好食,嗎	74	12	11	39
STU	2294	1905LYY	ST06	好食	74	13	12	39
STU	2295	ST06	1905LYY	拜拜	74	14	13	39
STU	2296	1905LYY	ST06	拜拜	74	15	14	39
STU	2304	ST06	1904MKL	你好	75	1	1	38
STU	2305	1904MKL	ST06	你好	75	2	2	38
STU	2306	1904MKL	ST06	校車	75	3	2	38
STU	2307	ST06	1904MKL	是	75	4	3	38
STU	2308	1904MKL	ST06	鍾意	75	5	4	38
STU	2309	ST06	1904MKL	豬	75	6	5	38
STU	2310	ST06	1904MKL	薯仔	75	7	5	38
STU	2311	1904MKL	ST06	聽歌	75	8	6	38
STU	2312	ST06	1904MKL	鍾意	75	9	7	38
STU	2313	1904MKL	ST06	唔知道	75	10	8	38
STU	2314	1904MKL	ST06	洗澡	75	11	8	38
STU	2315	ST06	1904MKL	有	75	12	9	38
STU	2316	ST06	1904MKL	長褲	75	13	9	38
STU	2317	1904MKL	ST06	有	75	14	10	38
STU	2318	1904MKL	ST06	薯片,鍾意,嗎	75	15	10	38
STU	2319	ST06	1904MKL	鍾意	75	16	11	38
STU	2320	ST06	1904MKL	蝦片,鍾意,嗎	75	17	11	38
STU	2321	1904MKL	ST06	唔鍾意	75	18	12	38
STU	2322	1904MKL	ST06	紫菜,鍾意,嗎	75	19	12	38
STU	2323	ST06	1904MKL	鍾意	75	20	13	38
STU	2324	1904MKL	ST06	聖誕老人	75	21	14	38
STU	2325	ST06	1904MKL	開心	75	22	15	38
STU	2326	ST06	1904MKL	揮春	75	23	15	38
STU	2327	1904MKL	ST06	有	75	24	16	38
STU	2328	ST06	1904MKL	有	75	25	17	38
STU	2329	1904MKL	ST06	八達通咭	75	26	18	38
STU	2330	ST06	1904MKL	有	75	27	19	38
STU	2331	1904MKL	ST06	簿	75	28	20	38
STU	2332	ST06	1904MKL	有	75	29	21	38
STU	2333	ST06	1904MKL	鍾意	75	30	21	38
STU	2334	1904MKL	ST06	藥房	75	31	22	38
STU	2335	ST06	1904MKL	我	75	32	23	38
STU	2336	1904MKL	ST06	唔鍾意	75	33	24	38
STU	2337	1904MKL	ST06	污糟	75	34	24	38
STU	2338	1904MKL	ST06	洗髮	75	35	24	38
STU	2339	ST06	1904MKL	OK	75	36	25	38
STU	2340	1904MKL	ST06	拜拜	75	37	26	38
STU	2365	ST08	1913CHY	你好	76	1	1	46
STU	2366	ST08	1913CHY	你好	76	2	1	46
STU	2367	1913CHY	ST08	你好	76	3	2	46
STU	2368	ST08	1913CHY	你,鍾意,飲,甚麼	76	4	3	46
STU	2369	1913CHY	ST08	鍾意,飲,茶	76	5	4	46
STU	2370	ST08	1913CHY	鍾意,食,甚麼	76	6	5	46
STU	2371	ST08	1913CHY	你好	76	7	5	46
STU	2372	1913CHY	ST08	你好	76	8	6	46
STU	2373	ST08	1913CHY	你,剛才,食,甚麼	76	9	7	46
STU	2375	1913CHY	ST08	食,麵	76	10	8	46
STU	2376	ST08	1913CHY	你,飲,甚麼	76	11	9	46
STU	2380	1913CHY	ST08	我,飲,茶	76	12	10	46
STU	2383	ST08	1913CHY	拜拜	76	13	11	46
STU	2384	1913CHY	ST08	拜拜	76	14	12	46
STU	2385	ST08	1617TLC	你好	77	1	1	43
STU	2386	1617TLC	ST08	你好	77	2	2	43
STU	2387	ST08	1617TLC	你,上午,食,甚麼	77	3	3	43
STU	2388	1617TLC	ST08	我,食,三文治	77	4	4	43
STU	2389	ST08	1617TLC	你,鍾意,飲,甚麼	77	5	5	43
STU	2390	1617TLC	ST08	我,鍾意,飲,汽水	77	6	6	43
STU	2391	ST08	1617TLC	拜拜	77	7	7	43
STU	2392	1617TLC	ST08	拜拜	77	8	8	43
STU	2393	ST08	1617TLC	你好	78	1	1	43
STU	2394	1617TLC	ST08	我,OK	78	2	2	43
STU	2395	ST08	1617TLC	你,何時,上班	78	3	3	43
STU	2396	1617TLC	ST08	我,上午,上班	78	4	4	43
STU	2397	ST08	1617TLC	端午節,食,甚麼	78	5	5	43
STU	2400	1617TLC	ST08	端午節,食,粽	78	6	6	43
STU	2401	1617TLC	ST08	我	78	7	6	43
STU	2405	1617TLC	ST08	我,唔鍾意,食,粽	78	8	6	43
STU	2407	ST08	1617TLC	你,鍾意,畫畫,嗎	78	9	7	43
STU	2409	1617TLC	ST08	我,鍾意,畫畫	78	10	8	43
STU	2412	1617TLC	ST08	晚禮服,我,畫畫	78	11	8	43
STU	2413	ST08	1617TLC	晚禮服,你,何時,畫畫	78	12	9	43
STU	2414	1617TLC	ST08	1,6	78	13	10	43
STU	2415	1617TLC	ST08	拜拜	78	14	10	43
STU	2416	ST08	1617TLC	拜拜	78	15	11	43
STU	2417	ST08	1912LWY	你好	79	1	1	45
STU	2418	ST08	1912LWY	你好	79	2	1	45
STU	2419	1912LWY	ST08	OK	79	3	2	45
STU	2420	ST08	1912LWY	上午,食,甚麼	79	4	3	45
STU	2421	1912LWY	ST08	麵	79	5	4	45
STU	2422	ST08	1912LWY	一陣,食,甚麼	79	6	5	45
STU	2423	1912LWY	ST08	啫喱,月餅	79	7	6	45
STU	2424	ST08	1912LWY	鍾意,飲,甚麼	79	8	7	45
STU	2425	1912LWY	ST08	可樂	79	9	8	45
STU	2426	ST08	1909SML	你好	80	1	1	44
STU	2428	1909SML	ST08	打招呼	80	2	2	44
STU	2430	ST08	1909SML	上午,食,甚麼	80	3	3	44
STU	2431	ST08	1909SML	你,鍾意,食,甚麼	80	4	3	44
STU	2433	1909SML	ST08	OK	80	5	4	44
STU	2434	1909SML	ST08	腸粉	80	6	4	44
STU	2435	ST08	1909SML	你,鍾意,飲,甚麼	80	7	5	44
STU	2439	1909SML	ST08	拜拜	80	8	6	44
STU	2444	ST06	1902YL	你好	81	1	1	35
STU	2445	1902YL	ST06	你好	81	2	2	35
STU	2446	ST06	1902YL	聽歌,嗎	81	3	3	35
STU	2447	1902YL	ST06	OK	81	4	4	35
STU	2448	ST06	1902YL	開心,嗎	81	5	5	35
STU	2449	1902YL	ST06	OK	81	6	6	35
STU	2450	1902YL	ST06	嗎	81	7	6	35
STU	2451	1902YL	ST06	嗎	81	8	6	35
STU	2452	ST06	1902YL	鍾意,薯條,嗎	81	9	7	35
STU	2453	1902YL	ST06	熨斗	81	10	8	35
STU	2454	1902YL	ST06	你好,OK	81	11	8	35
STU	2455	1902YL	ST06	發燒,嘔	81	12	8	35
STU	2456	1902YL	ST06	污糟	81	13	8	35
STU	2457	1902YL	ST06	嗎	81	14	8	35
STU	2458	1902YL	ST06	鉛筆	81	15	8	35
STU	2459	ST06	1902YL	昨天,發燒	81	16	9	35
STU	2460	1902YL	ST06	媽媽,老師	81	17	10	35
STU	2461	1902YL	ST06	BB	81	18	10	35
STU	2462	1902YL	ST06	拜拜	81	19	10	35
STU	2463	ST06	1902YL	拜拜	81	20	11	35
STU	2473	ST06	1906HYN	你好	82	1	1	40
STU	2474	1906HYN	ST06	你好	82	2	2	40
STU	2475	ST06	1906HYN	你好	82	3	3	40
STU	2476	1906HYN	ST06	你好	82	4	4	40
STU	2477	ST06	1906HYN	你好	82	5	5	40
STU	2478	1906HYN	ST06	你好	82	6	6	40
STU	2479	ST06	1906HYN	聽歌	82	7	7	40
STU	2480	ST06	1906HYN	聽歌,嗎	82	8	7	40
STU	2481	1906HYN	ST06	OK	82	9	8	40
STU	2482	1906HYN	ST06	拜拜	82	10	8	40
STU	2483	ST06	1906HYN	你好	82	11	9	40
STU	2484	1906HYN	ST06	你好	82	12	10	40
STU	2485	ST06	1906HYN	聽歌,嗎	82	13	11	40
STU	2486	1906HYN	ST06	OK	82	14	12	40
STU	2487	ST06	1906HYN	拜拜	82	15	13	40
STU	2488	1906HYN	ST06	拜拜	82	16	14	40
STU	2489	1906HYN	ST06	花	83	1	1	40
STU	2490	ST06	1906HYN	芝士	83	2	2	40
STU	2491	ST06	1906HYN	開心	83	3	2	40
STU	2492	1906HYN	ST06	牛奶	83	4	3	40
STU	2493	ST06	1906HYN	你好	83	5	4	40
STU	2494	1906HYN	ST06	OK	83	6	5	40
STU	2495	ST06	1906HYN	你好	83	7	6	40
STU	2496	1906HYN	ST06	爸爸,哥哥	83	8	7	40
STU	2497	ST06	1906HYN	你好	84	1	1	40
STU	2498	1906HYN	ST06	你好	84	2	2	40
STU	2499	1906HYN	ST06	紙	84	3	2	40
STU	2500	ST06	1906HYN	你好	84	4	3	40
STU	2501	1906HYN	ST06	粥	84	5	4	40
STU	2502	ST06	1906HYN	拜拜	84	6	5	40
STU	2503	1906HYN	ST06	拜拜	84	7	6	40
STU	2517	1603TWK	ST09	你好	85	1	1	48
STU	2518	1603TWK	ST09	雪糕	85	2	1	48
STU	2519	1603TWK	ST09	去	85	3	1	48
STU	2520	ST09	1603TWK	你好	85	4	2	48
STU	2521	1603TWK	ST09	你好	85	5	3	48
STU	2522	ST09	1603TWK	OK	85	6	4	48
STU	2523	1603TWK	ST09	OK	85	7	5	48
STU	2524	ST09	1603TWK	食,甚麼	85	8	6	48
STU	2525	1603TWK	ST09	水	85	9	7	48
STU	2526	ST09	1603TWK	我,食,麵包	85	10	8	48
STU	2527	ST09	1603TWK	拜拜	85	11	8	48
STU	2528	ST09	1603TWK	你好	86	1	1	48
STU	2529	1603TWK	ST09	你好	86	2	2	48
STU	2530	1603TWK	ST09	難食	86	3	2	48
STU	2531	ST09	1603TWK	食,甚麼	86	4	3	48
STU	2532	1603TWK	ST09	菜,水	86	5	4	48
STU	2533	1603TWK	ST09	OK,多謝,哥哥	86	6	4	48
STU	2534	ST09	1603TWK	多謝	86	7	5	48
STU	2535	ST09	1603TWK	去,哪裡	86	8	5	48
STU	2536	1603TWK	ST09	餐廳	86	9	6	48
STU	2537	ST09	1603TWK	拜拜	86	10	7	48
STU	2538	ST09	1901TTT	你好	87	1	1	49
STU	2539	1901TTT	ST09	你好	87	2	2	49
STU	2540	ST09	1901TTT	食,甚麼	87	3	3	49
STU	2541	ST09	1901TTT	拜拜	87	4	3	49
STU	2542	ST09	1602IKK	你好	88	1	1	47
STU	2543	ST09	1602IKK	你好	88	2	1	47
STU	2544	1602IKK	ST09	你好	88	3	2	47
STU	2545	1602IKK	ST09	美食廣場	88	4	2	47
STU	2546	ST09	1602IKK	去,哪裡	88	5	3	47
STU	2547	1602IKK	ST09	雪糕,士多啤梨,蛋撻	88	6	4	47
STU	2548	ST09	1602IKK	食,麵包	88	7	5	47
STU	2549	1602IKK	ST09	食,腸粉,牛肉	88	8	6	47
STU	2550	ST09	1602IKK	拜拜	88	9	7	47
STU	2619	ST02	1914KSY	你好	89	1	1	25
STU	2620	1914KSY	ST02	你好	89	2	2	25
STU	2621	ST02	1914KSY	你,剛才,食,甚麼	89	3	3	25
STU	2622	1914KSY	ST02	我,食,菜,蘿蔔,薯仔	89	4	4	25
STU	2623	ST02	1914KSY	端午節,有,無,食,粽	89	5	5	25
STU	2624	1914KSY	ST02	無	89	6	6	25
STU	2628	1914KSY	ST02	你,端午節,有,無,食,粽	89	7	6	25
STU	2629	ST02	1914KSY	我,有,食,粽,好食	89	8	7	25
STU	2631	1914KSY	ST02	我,一起玩耍,打乒乓球	89	9	8	25
STU	2633	ST02	1914KSY	我地,嗎	89	10	9	25
STU	2637	1914KSY	ST02	我地	89	11	10	25
STU	2638	ST02	1914KSY	何時	89	12	11	25
STU	2643	ST02	1914KSY	7,熱	89	13	11	25
STU	2644	1914KSY	ST02	OK	89	14	12	25
STU	2645	ST02	1914KSY	OK	89	15	13	25
STU	2646	ST02	1914KSY	拜拜	89	16	13	25
STU	2647	1914KSY	ST02	拜拜	89	17	14	25
STU	2652	ST02	1916SKM	你好	90	1	1	27
STU	2653	ST02	1916SKM	你好	90	2	1	27
STU	2654	ST02	1916SKM	你,上午,食,甚麼	90	3	1	27
STU	2655	1916SKM	ST02	我,食,叉燒,麵	90	4	2	27
STU	2656	ST02	1916SKM	你,夜晚,何時,食飯	90	5	3	27
STU	2657	1916SKM	ST02	8	90	6	4	27
STU	2658	ST02	1916SKM	一陣,誰,老師,上課	90	7	5	27
STU	2659	ST02	1916SKM	你,鍾意,去,哪裡	90	8	5	27
STU	2660	1916SKM	ST02	天壇大佛	90	9	6	27
STU	2661	ST02	1916SKM	坐,甚麼,巴士,去	90	10	7	27
STU	2662	1916SKM	ST02	巴士,山頂纜車	90	11	8	27
STU	2663	ST02	1916SKM	OK,拜拜	90	12	9	27
STU	2664	1916SKM	ST02	拜拜	90	13	10	27
STU	2665	1909SML	ST08	你好	91	1	1	44
STU	2666	1909SML	ST08	你好	91	2	1	44
STU	2667	ST08	1909SML	你好	91	3	2	44
STU	2668	ST08	1909SML	你,鍾意,食,甚麼	91	4	2	44
STU	2669	1909SML	ST08	我,鍾意,食,燒賣,意大利粉	91	5	3	44
STU	2670	ST08	1909SML	你,鍾意,飲,甚麼	91	6	4	44
STU	2671	1909SML	ST08	我,鍾意,飲,檸檬茶	91	7	5	44
STU	2672	ST08	1909SML	何時,上班	91	8	6	44
STU	2673	1909SML	ST08	上午,10,上班	91	9	7	44
STU	2674	ST08	1909SML	你,怎樣,上班	91	10	8	44
STU	2675	1909SML	ST08	我,坐,巴士,上班	91	11	9	44
STU	2676	ST08	1909SML	一陣,去,哪裡	91	12	10	44
STU	2677	1909SML	ST08	我,一陣,去,醫院	91	13	11	44
STU	2678	1909SML	ST08	拜拜	91	14	11	44
STU	2679	ST08	1909SML	拜拜	91	15	12	44
STU	2701	ST02	1914KSY	你好	92	1	1	25
STU	2702	1914KSY	ST02	你好	92	2	2	25
STU	2703	1914KSY	ST02	一陣,上課,做甚麼	92	3	2	25
STU	2704	ST02	1914KSY	玩電腦	92	4	3	25
STU	2705	1914KSY	ST02	誰,玩電腦	92	5	4	25
STU	2706	ST02	1914KSY	老師,同學	92	6	5	25
STU	2722	ST06	1902YL	你好	93	1	1	35
STU	2723	1902YL	ST06	你好	93	2	2	35
STU	2724	1902YL	ST06	藥房	93	3	2	35
STU	2725	ST06	1902YL	哪裡	93	4	3	35
STU	2726	1902YL	ST06	我	93	5	4	35
STU	2727	1902YL	ST06	我	93	6	4	35
STU	2728	ST06	1902YL	你,怎樣	93	7	5	35
STU	2729	1902YL	ST06	我,校長,我,職業治療師,車,電飯煲	93	8	6	35
STU	2730	ST06	1902YL	是	93	9	7	35
STU	2731	1902YL	ST06	電飯煲,復活節,兒童節	93	10	8	35
STU	2732	ST06	1902YL	拜拜	93	11	9	35
STU	2733	ST06	1902YL	你好	94	1	1	35
STU	2734	1902YL	ST06	幫忙,發燒,抽筋,中秋節,我,兒童節	94	2	2	35
STU	2735	1902YL	ST06	我	94	3	2	35
STU	2736	1902YL	ST06	我	94	4	2	35
STU	2737	ST06	1902YL	唔知道	94	5	3	35
STU	2738	1902YL	ST06	BB,你,廁所,我,你	94	6	4	35
STU	2739	ST06	1902YL	你,去,洗手間,嗎	94	7	5	35
STU	2740	1902YL	ST06	梳化,發燒	94	8	6	35
STU	2741	ST06	1902YL	唔知道	94	9	7	35
STU	2742	1902YL	ST06	OK	94	10	8	35
STU	2743	1902YL	ST06	拜拜	94	11	8	35
STU	2744	ST06	1902YL	拜拜	94	12	9	35
STU	2745	ST06	1902YL	你好	95	1	1	35
STU	2746	1902YL	ST06	你好	95	2	2	35
STU	2747	ST06	1902YL	我,OK	95	3	3	35
STU	2748	ST06	1902YL	多謝	95	4	3	35
STU	2749	1902YL	ST06	你好,一起玩耍	95	5	4	35
STU	2750	ST06	1902YL	OK	95	6	5	35
STU	2751	1902YL	ST06	拜拜	95	7	6	35
STU	2752	ST06	1902YL	拜拜	95	8	7	35
STU	2753	ST06	1902YL	你好	96	1	1	35
STU	2754	1902YL	ST06	你好	96	2	2	35
STU	2755	ST06	1902YL	巴士,鍾意,嗎	96	3	3	35
STU	2756	1902YL	ST06	唔鍾意	96	4	4	35
STU	2757	ST06	1902YL	飛機,鍾意,嗎	96	5	5	35
STU	2758	1902YL	ST06	唔鍾意	96	6	6	35
STU	2759	ST06	1902YL	OK	96	7	7	35
STU	2760	ST06	1902YL	拜拜	96	8	7	35
STU	2761	1902YL	ST06	拜拜	96	9	8	35
